# Supplementary material for: Core Mycobiome and Their Ecological Relevance in the Gut of Five Ips Bark Beetles (Coleoptera: Curculionidae: Scolytinae)
Source: Front Microbiol. 2020 Sep 3;11:568853. doi: 10.3389/fmicb.2020.568853 (PMC7496905; doi:10.3389/fmicb.2020.568853)
Supplement: Supplementary file 3 [file Table_3.XLS]

## Sheet: Supplementary excel 3_otu_table
#OTU_num	PP	IAC	SX	IC	ID	IT	Taxonomy
OTU_1	0	0	0.708176	0.003257	3.4e-05	0.006073	No blast hit
OTU_2	4e-06	0.000478	0.003667	0.008263	0.349311	0.371783	k__Fungi;p__Ascomycota;c__Saccharomycetes;o__Saccharomycetales;f__Incertae_sedis_Saccharomycetales;g__Cyberlindnera;s__Cyberlindnera amylophila
OTU_3	0	0	0.00639	0.700614	0.004749	0.069607	k__Fungi;p__Ascomycota;c__Saccharomycetes;o__Saccharomycetales;f__Pichiaceae;g__Nakazawaea
OTU_4	0	0.085525	0	0	0	0	No blast hit
OTU_5	0.011594	0.000783	0.005849	0.027617	0.316647	0.01503	k__Fungi;p__Ascomycota;c__Saccharomycetes;o__Saccharomycetales;f__Pichiaceae;g__Yamadazyma;s__Yamadazyma scolyti
OTU_6	9.7e-05	0	0.111996	0.000742	0.015097	0.091363	k__Fungi;p__Ascomycota;c__Sordariomycetes
OTU_7	3.7e-05	0.048981	0.028072	0.01481	0.031608	0.137636	k__Fungi;p__Ascomycota;c__Saccharomycetes;o__Saccharomycetales
OTU_8	0.128429	4e-06	3.7e-05	0.062758	0.144899	0.006226	k__Fungi;p__Ascomycota;c__Saccharomycetes;o__Saccharomycetales;f__Trichomonascaceae;g__Blastobotrys;s__Blastobotrys proliferans
OTU_9	0	0.109314	0.000388	0.002656	0.00291	0.000242	k__Fungi;p__Ascomycota;c__Saccharomycetes;o__Saccharomycetales;f__Saccharomycetaceae;g__Kuraishia;s__Kuraishia capsulata
OTU_10	0	0.084286	0.00764	0.00047	0.001287	0.084701	k__Fungi;p__Ascomycota;c__Saccharomycetes;o__Saccharomycetales;f__Incertae_sedis_Saccharomycetales;g__Cyberlindnera;s__Cyberlindnera mississippiensis
OTU_11	0.375335	0.000246	0	0	0	0	No blast hit
OTU_12	0	0.067432	0	0	0	0	k__Fungi;p__Ascomycota;c__Sordariomycetes;o__Ophiostomatales;f__Ophiostomataceae
OTU_13	0	0.000776	0.000843	0.075632	0.004518	0.007394	No blast hit
OTU_14	0.086652	0.000224	0.000358	1.1e-05	0	0.000392	k__Fungi;p__Ascomycota;c__Sordariomycetes;o__Hypocreales
OTU_15	0.090584	0.000459	9.3e-05	0.000321	7.1e-05	0.000291	k__Fungi;p__Ascomycota;c__Eurotiomycetes;o__Eurotiales;f__Trichocomaceae;g__Talaromyces;s__Talaromyces rugulosus
OTU_16	0.000392	0.031661	7e-06	4e-06	1.1e-05	7e-06	k__Fungi;p__Ascomycota;c__Sordariomycetes;o__Hypocreales;f__Nectriaceae;g__Fusarium;s__Fusarium oxysporum
OTU_17	8.6e-05	0.039334	0	0	0	0	k__Fungi;p__Ascomycota;c__Sordariomycetes
OTU_18	0.00163	0.000291	0.000425	0.000157	0.032824	0.002067	k__Fungi;p__Ascomycota;c__Sordariomycetes;o__Microascales;f__Microascaceae
OTU_19	3.4e-05	0.008416	0.041323	0.000589	0.009651	0.015675	k__Fungi;p__Ascomycota;c__Saccharomycetes;o__Saccharomycetales;f__Incertae_sedis_Saccharomycetales
OTU_20	0.024733	7e-06	0.000463	7.1e-05	0.002787	0.010098	k__Fungi;p__Ascomycota;c__Saccharomycetes;o__Saccharomycetales;f__Saccharomycetaceae;g__Kuraishia;s__Kuraishia capsulata
OTU_21	0	0.024774	0	3e-05	0	7e-06	No blast hit
OTU_22	4.5e-05	0.000127	0.008095	0.00031	0.015217	0.01888	k__Fungi;p__Ascomycota;c__Saccharomycetes;o__Saccharomycetales;f__Saccharomycetaceae
OTU_23	0.000257	0.034626	0	0	0	0	k__Fungi;p__Ascomycota;c__Sordariomycetes;o__Incertae_sedis_Sordariomycetes;f__Plectosphaerellaceae
OTU_24	0.002496	1.9e-05	0.000571	0.000209	0.005029	0.049089	k__Fungi;p__Ascomycota;c__Saccharomycetes
OTU_25	7e-06	0.000149	0.00044	0.028792	0.000175	0.000265	k__Fungi;p__Ascomycota;c__Sordariomycetes;o__Ophiostomatales;f__Ophiostomataceae
OTU_26	0.000119	0	0.009528	0.00063	0.000332	0.013303	k__Fungi;p__Ascomycota;c__Eurotiomycetes;o__Eurotiales;f__Trichocomaceae;g__Penicillium
OTU_27	0.027717	0.000254	0	0	0	0	k__Fungi;p__Basidiomycota;c__Agaricomycetes;o__Russulales;f__Peniophoraceae
OTU_28	7e-06	1.1e-05	0.001474	0.000272	0.016347	0.000955	k__Fungi;p__Ascomycota;c__Saccharomycetes;o__Saccharomycetales;f__Pichiaceae;g__Yamadazyma;s__Yamadazyma mexicana
OTU_29	3e-05	0.011841	0	1.9e-05	0	1.1e-05	k__Fungi;p__Ascomycota;c__Saccharomycetes;o__Saccharomycetales;f__Pichiaceae;g__Nakazawaea;s__Nakazawaea holstii
OTU_30	1.1e-05	0.012322	0	0	0	0	k__Fungi;p__Zygomycota;c__Incertae_sedis_Zygomycota;o__Mortierellales;f__Mortierellaceae
OTU_31	0	0	0.017895	6.3e-05	0	0.000134	No blast hit
OTU_32	3.4e-05	0.010442	0	0	0	0	k__Fungi;p__Ascomycota;c__Sordariomycetes;o__Incertae_sedis_Sordariomycetes;f__Incertae_sedis_Sordariomycetes;g__Myrmecridium;s__Myrmecridium schulzeri
OTU_33	0.007715	6.3e-05	0.000451	0.009841	0.001197	0.003171	k__Fungi;p__Ascomycota;c__Eurotiomycetes;o__Eurotiales;f__Trichocomaceae;g__Penicillium
OTU_34	0.00028	2.2e-05	0.000627	0.000134	0.022864	0.001265	No blast hit
OTU_35	0.000425	0.000112	0.012158	0.002026	0.000228	0.001272	k__Fungi;p__Ascomycota;c__Dothideomycetes;o__Capnodiales;f__Davidiellaceae;g__Cladosporium
OTU_36	0.020797	6.7e-05	0	7e-06	6.7e-05	0	k__Fungi;p__Ascomycota;c__Saccharomycetes;o__Incertae_sedis_Saccharomycetes;f__Incertae_sedis_Saccharomycetes;g__Danielozyma;s__Danielozyma ontarioensis
OTU_37	0.000257	1.1e-05	2.6e-05	0.011911	0.000145	0.000377	k__Fungi;p__Ascomycota;c__Saccharomycetes;o__Saccharomycetales;f__Incertae_sedis_Saccharomycetales;g__Candida;s__Candida tenuis
OTU_38	0.001597	2.2e-05	6e-05	0.000302	0.006804	0.003171	k__Fungi;p__Ascomycota;c__Eurotiomycetes;o__Eurotiales;f__Trichocomaceae;g__Penicillium
OTU_39	0.014493	0	0	0	0	0	No blast hit
OTU_40	0	0.007595	0.000287	3e-05	0.000108	0.000145	k__Fungi;p__Ascomycota;c__Saccharomycetes;o__Saccharomycetales;f__Lipomycetaceae
OTU_41	0.014829	1.5e-05	0	0	0	0	k__Fungi;p__Ascomycota;c__Sordariomycetes;o__Microascales;f__Ceratocystidaceae
OTU_42	0	8.2e-05	0.000101	3e-05	5.6e-05	0.006014	k__Fungi;p__Ascomycota;c__Sordariomycetes;o__Ophiostomatales;f__Ophiostomataceae;g__Ophiostoma;s__Ophiostoma nigrocarpum
OTU_43	6.3e-05	0.005723	0	0	0	0	k__Fungi;p__Ascomycota;c__Sordariomycetes;o__Hypocreales;f__Incertae_sedis_Hypocreales;g__Acremonium;s__Acremonium furcatum
OTU_44	0.002701	3.4e-05	0.001209	0.002332	0.000541	0.002779	k__Fungi;p__Ascomycota;c__Eurotiomycetes;o__Eurotiales;f__Trichocomaceae;g__Penicillium
OTU_45	0	0	0.007233	4.8e-05	4e-06	0.000325	k__Fungi;p__Ascomycota;c__Saccharomycetes;o__Saccharomycetales;f__Incertae_sedis_Saccharomycetales;g__Peterozyma;s__Peterozyma xylosa
OTU_46	0.001302	3.4e-05	0.000455	0.008561	0.000347	0.000996	k__Fungi;p__Ascomycota;c__Eurotiomycetes;o__Eurotiales;f__Trichocomaceae;g__Penicillium
OTU_47	0.012628	6.3e-05	0	0	0	0	k__Fungi;p__Basidiomycota;c__Agaricomycetes
OTU_48	0	0.004342	0	0	0	0	k__Fungi;p__Ascomycota;c__Sordariomycetes;o__Microascales;f__Ceratocystidaceae
OTU_49	5.6e-05	0.002902	0.000168	6.7e-05	0.000246	0.004148	k__Fungi;p__Ascomycota;c__Saccharomycetes;o__Saccharomycetales;f__Pichiaceae;g__Ogataea;s__Ogataea neopini
OTU_50	0	0.005137	0.000104	0	0	5.2e-05	k__Fungi;p__Basidiomycota;c__Microbotryomycetes;o__Sporidiobolales;f__Incertae_sedis_Sporidiobolales;g__Rhodotorula;s__Rhodotorula hylophila
OTU_51	4.8e-05	0.004256	0	0	0	0	k__Fungi;p__Ascomycota;c__Sordariomycetes;o__Hypocreales;f__Nectriaceae
OTU_52	7e-06	0.003257	0	0	0	0	k__Fungi;p__Ascomycota;c__Sordariomycetes;o__Microascales;f__Ceratocystidaceae;g__Ceratocystis;s__Ceratocystis paradoxa
OTU_53	0	0	4.8e-05	2.6e-05	5.2e-05	0.004697	k__Fungi;p__Ascomycota;c__Sordariomycetes;o__Hypocreales;f__Cordycipitaceae
OTU_54	5.2e-05	4e-06	4.5e-05	0.000597	4.8e-05	0.003503	k__Fungi;p__Ascomycota;c__Eurotiomycetes;o__Eurotiales;f__Trichocomaceae;g__Penicillium;s__Penicillium angulare
OTU_55	8.6e-05	4.8e-05	0.002705	0.00141	1.5e-05	0.000194	k__Fungi;p__Ascomycota;c__Leotiomycetes;o__Incertae_sedis_Leotiomycetes
OTU_56	0	0	0.005543	3e-05	0	2.6e-05	k__Fungi;p__Ascomycota;c__Saccharomycetes;o__Saccharomycetales;f__Incertae_sedis_Saccharomycetales
OTU_57	0.003354	0	0.000302	0.000108	0.000713	0.001962	k__Fungi;p__Ascomycota;c__Eurotiomycetes;o__Eurotiales;f__Trichocomaceae;g__Penicillium;s__Penicillium dierckxii
OTU_58	6.7e-05	0.000541	0.000295	0.00056	0.0011	0.000172	k__Fungi;p__Basidiomycota;c__Tremellomycetes;o__Tremellales;f__Incertae_sedis_Tremellales;g__Cryptococcus
OTU_59	0.03031	1.1e-05	0	0	0	0	No blast hit
OTU_60	4.8e-05	7.8e-05	2.6e-05	0.003171	7e-06	2.2e-05	k__Fungi;p__Ascomycota;c__Sordariomycetes;o__Microascales;f__Ceratocystidaceae;g__Ceratocystis
OTU_61	0.004891	6.7e-05	7.1e-05	3e-05	0.000261	0.001563	k__Fungi;p__Ascomycota;c__Eurotiomycetes;o__Eurotiales;f__Trichocomaceae;g__Talaromyces;s__Talaromyces variabilis
OTU_62	0	0.001802	0	0	0	0	k__Fungi;p__Ascomycota;c__Eurotiomycetes;o__Chaetothyriales;f__Herpotrichiellaceae
OTU_63	1.1e-05	0.000164	0.000157	4.5e-05	0.002817	0.000884	k__Fungi;p__Ascomycota;c__Sordariomycetes;o__Ophiostomatales;f__Ophiostomataceae;g__Ophiostoma;s__Ophiostoma bicolor
OTU_64	0	0	2.2e-05	0.002402	2.6e-05	2.2e-05	k__Fungi;p__Ascomycota;c__Lecanoromycetes;o__Umbilicariales;f__Ophioparmaceae;g__Hypocenomyce;s__Hypocenomyce scalaris
OTU_65	0	0.000112	4.5e-05	0.002253	0.000261	0.00025	k__Fungi;p__Basidiomycota;c__Microbotryomycetes;o__Sporidiobolales;f__Incertae_sedis_Sporidiobolales;g__Rhodotorula;s__Rhodotorula hylophila
OTU_66	0.007651	0	0	0	0	0	No blast hit
OTU_67	0	0	1.5e-05	0.003391	0	0	No blast hit
OTU_68	4e-06	0	1.9e-05	0.003585	0	4e-06	k__Fungi;p__Ascomycota;c__Eurotiomycetes
OTU_69	6.3e-05	0.001824	0	0	0	0	k__Fungi;p__Ascomycota;c__Sordariomycetes;o__Hypocreales;f__Nectriaceae
OTU_70	0	0.001533	2.2e-05	0.000157	0.000265	4.8e-05	k__Fungi;p__Ascomycota;c__Saccharomycetes;o__Saccharomycetales;f__Saccharomycopsidaceae;g__Saccharomycopsis;s__Saccharomycopsis lassenensis
OTU_71	0	0.001332	1.9e-05	1.1e-05	1.1e-05	2.6e-05	No blast hit
OTU_72	0.000205	4.8e-05	8.2e-05	1.9e-05	0.000172	0.001347	k__Fungi
OTU_73	1.5e-05	1.5e-05	3.4e-05	4e-06	3.7e-05	0.001619	k__Fungi;p__Ascomycota;c__Sordariomycetes;o__Hypocreales;f__Nectriaceae;g__Fusarium;s__Fusarium solani
OTU_74	0	0.001578	0	0	0	0	k__Fungi;p__Zygomycota;c__Incertae_sedis_Zygomycota;o__Mortierellales;f__Mortierellaceae;g__Mortierella;s__Mortierella elongata
OTU_75	0	0.00113	0	0	0	0	No blast hit
OTU_76	4e-06	4e-06	0.000198	1.5e-05	1.1e-05	0.001414	k__Fungi;p__Ascomycota;c__Sordariomycetes;o__Hypocreales;f__Hypocreaceae;g__Trichoderma
OTU_77	0.000567	7e-06	0.000145	0.000325	0.000213	0.000336	k__Fungi;p__Ascomycota;c__Sordariomycetes;o__Incertae_sedis_Sordariomycetes;f__Incertae_sedis_Sordariomycetes
OTU_78	0.000108	0.001153	0	0	0	0	k__Fungi;p__Zygomycota;c__Incertae_sedis_Zygomycota;o__Mortierellales;f__Mortierellaceae;g__Mortierella;s__Mortierella alpina
OTU_79	7.8e-05	0.0016	0	0	0	0	k__Fungi;p__Ascomycota;c__Sordariomycetes;o__Hypocreales
OTU_80	0	0	0.001048	0.001574	1.1e-05	1.5e-05	k__Fungi;p__Basidiomycota;c__Agaricomycetes
OTU_81	0	0	0.000944	4e-06	0	5.2e-05	k__Fungi;p__Basidiomycota;c__Agaricomycetes;o__Agaricales;f__Pleurotaceae;g__Nematoctonus;s__Nematoctonus robustus
OTU_82	5.2e-05	0.000291	1.5e-05	0	0	0.000683	k__Fungi;p__Ascomycota;c__Sordariomycetes;o__Hypocreales;f__Hypocreaceae;g__Trichoderma
OTU_83	0.0016	0	0	0	0	0	No blast hit
OTU_84	0	0.000153	0.001503	1.9e-05	0	0.000134	k__Fungi;p__Ascomycota;c__Sordariomycetes;o__Microascales;f__Ceratocystidaceae;g__Ceratocystis;s__Ceratocystis ips
OTU_85	0.000254	0.000851	0	0	0	7e-06	k__Fungi;p__Ascomycota;c__Sordariomycetes;o__Hypocreales;f__Nectriaceae
OTU_86	0.001186	3.4e-05	0	0	0	0	k__Fungi;p__Ascomycota;c__Sordariomycetes
OTU_87	0	0.000616	0	0	0	0	k__Fungi;p__Ascomycota;c__Sordariomycetes;o__Sordariales
OTU_88	0	0	0.000989	0	0	1.9e-05	No blast hit
OTU_89	0	0.000556	4e-06	0	0	2.6e-05	k__Fungi;p__Basidiomycota
OTU_90	0	0.000765	0	0	0	0	No blast hit
OTU_91	0	0.000522	0	0	0	0	No blast hit
OTU_92	0	0.000578	0	0	0	0	No blast hit
OTU_93	0.000127	1.5e-05	1.9e-05	0	0.000153	0.000746	k__Fungi;p__Ascomycota;c__Sordariomycetes;o__Ophiostomatales;f__Ophiostomataceae;g__Ceratocystiopsis;s__Ceratocystiopsis minuta
OTU_94	1.1e-05	0	1.5e-05	0.000701	7e-06	0.000175	No blast hit
OTU_95	6.7e-05	0.001261	0	0	0	0	k__Fungi;p__Ascomycota;c__Sordariomycetes
OTU_96	0	0.000537	1.1e-05	0	0	0	k__Fungi;p__Ascomycota;c__Sordariomycetes;o__Hypocreales;f__Incertae_sedis_Hypocreales;g__Ilyonectria;s__Ilyonectria crassa
OTU_97	0	0	1.1e-05	4e-06	1.5e-05	0.000634	No blast hit
OTU_98	1.5e-05	0	7e-06	0.001119	0	0	No blast hit
OTU_99	2.6e-05	0.000671	1.1e-05	1.9e-05	0	4e-06	k__Fungi;p__Zygomycota;c__Incertae_sedis_Zygomycota;o__Mortierellales;f__Mortierellaceae;g__Mortierella;s__Mortierella elongata
OTU_100	0.001253	1.5e-05	0	0	0	0	k__Fungi;p__Ascomycota;c__Eurotiomycetes;o__Eurotiales;f__Trichocomaceae;g__Penicillium;s__Penicillium phoeniceum
OTU_101	0.001791	1.5e-05	0	4e-06	4.1e-05	2.6e-05	k__Fungi;p__Ascomycota;c__Eurotiomycetes;o__Eurotiales;f__Trichocomaceae;g__Aspergillus
OTU_102	0.000974	0	0	0	0	0	k__Fungi;p__Ascomycota;c__Leotiomycetes;o__Helotiales;f__Vibrisseaceae
OTU_103	0.001626	1.1e-05	0	0	0	0	k__Fungi;p__Ascomycota;c__Eurotiomycetes;o__Eurotiales;f__Trichocomaceae
OTU_104	0	4e-06	0.000526	4e-06	0	7e-06	k__Fungi;p__Ascomycota;c__Saccharomycetes;o__Saccharomycetales;f__Incertae_sedis_Saccharomycetales;g__Candida;s__Candida arabinofermentans
OTU_105	0.000112	0	4e-06	4.8e-05	0.000381	4e-06	k__Fungi;p__Ascomycota;c__Dothideomycetes;o__Capnodiales;f__Incertae_sedis_Capnodiales
OTU_106	5.2e-05	0	0	8.6e-05	0.000366	7e-06	k__Fungi;p__Ascomycota
OTU_107	1.5e-05	0	1.9e-05	0.000481	3e-05	6.7e-05	k__Fungi;p__Ascomycota;c__Eurotiomycetes
OTU_108	0.000727	4e-06	0	0	0	0	k__Fungi;p__Ascomycota;c__Saccharomycetes;o__Saccharomycetales;f__Incertae_sedis_Saccharomycetales;g__Wickerhamomyces;s__Wickerhamomyces hampshirensis
OTU_109	0	0.000399	0	0	0	0	k__Fungi;p__Ascomycota;c__Sordariomycetes
OTU_110	0	0.000142	3.7e-05	0.002186	4.1e-05	0.000489	k__Fungi;p__Ascomycota;c__Saccharomycetes
OTU_111	0	0	0.000649	0	0	0	No blast hit
OTU_112	4.1e-05	0.000366	2.2e-05	2.2e-05	4e-06	0	k__Fungi;p__Ascomycota
OTU_113	7.8e-05	1.9e-05	0	0	0.000381	6e-05	k__Fungi;p__Ascomycota
OTU_114	0.000101	0	2.2e-05	0.000134	2.2e-05	0.000321	k__Fungi;p__Ascomycota;c__Eurotiomycetes;o__Eurotiales;f__Trichocomaceae;g__Penicillium;s__Penicillium catenatum
OTU_115	0.000966	4.5e-05	3e-05	9e-05	0.000306	0.000328	k__Fungi;p__Basidiomycota;c__Incertae_sedis_Basidiomycota;o__Malasseziales;f__Malasseziaceae;g__Malassezia
OTU_116	0	0	4e-06	4e-06	4e-06	0.000418	No blast hit
OTU_117	0	0	0	0	0.000369	0	No blast hit
OTU_118	0	0	0.000873	1.1e-05	0	0	No blast hit
OTU_119	0.000694	1.5e-05	0	0	0	0	k__Fungi;p__Ascomycota;c__Dothideomycetes;o__Pleosporales;f__Pleosporaceae;g__Alternaria;s__Alternaria pluriseptata
OTU_120	0	0.000257	0	0	0	0	k__Fungi;p__Ascomycota;c__Saccharomycetes;o__Saccharomycetales;f__Lipomycetaceae
OTU_121	0	0	1.1e-05	4e-06	0	0.000366	No blast hit
OTU_122	0	0.000209	0	0	0	0	k__Fungi;p__Ascomycota
OTU_123	0	0	0	0.000325	4e-06	0	No blast hit
OTU_124	9.7e-05	9.3e-05	0	7e-06	1.9e-05	6e-05	k__Fungi;p__Ascomycota;c__Dothideomycetes;o__Pleosporales;f__Pleosporaceae;g__Alternaria
OTU_125	4e-06	0	4e-06	4e-06	0	0.000369	k__Fungi;p__Ascomycota;c__Sordariomycetes;o__Hypocreales;f__Nectriaceae;g__Fusarium
OTU_126	1.9e-05	0	0	0	0.000201	7e-06	k__Fungi;p__Ascomycota;c__Leotiomycetes
OTU_127	0	0	4e-06	0.000157	9.7e-05	7e-06	k__Fungi;p__Ascomycota;c__Eurotiomycetes
OTU_128	0.000854	1.1e-05	0	7e-06	0	0	k__Fungi;p__Ascomycota
OTU_129	0	0	0	0.000272	4e-06	7e-06	k__Fungi;p__Ascomycota;c__Leotiomycetes;o__Incertae_sedis_Leotiomycetes;f__Myxotrichaceae
OTU_130	0	7e-06	2.2e-05	7.5e-05	0.000231	5.2e-05	k__Fungi;p__Basidiomycota;c__Tremellomycetes;o__Tremellales;f__Incertae_sedis_Tremellales;g__Cuniculitrema;s__Cuniculitrema polymorpha
OTU_131	1.1e-05	0.000142	0	0	0	0	No blast hit
OTU_132	0.000157	6.3e-05	0	0	0	0	k__Fungi;p__Basidiomycota;c__Agaricomycetes;o__Auriculariales;f__Incertae_sedis_Auriculariales;g__Exidia;s__Exidia saccharina
OTU_133	0	0	0	0.000459	0	0	k__Fungi;p__Basidiomycota;c__Tremellomycetes;o__Tremellales;f__Incertae_sedis_Tremellales
OTU_134	1.9e-05	0.000332	0	0	0	0	k__Fungi;p__Ascomycota;c__Sordariomycetes;o__Microascales;f__Ceratocystidaceae;g__Ceratocystis;s__Ceratocystis minor
OTU_135	0.000284	0	0	0	0	0	No blast hit
OTU_136	0	0	0.000123	0.000153	0	4e-06	k__Fungi;p__Ascomycota
OTU_137	0.000384	0	0	0	0	0	No blast hit
OTU_138	0	0.004999	0	0	0	0	No blast hit
OTU_139	0.000451	1.5e-05	0	0	0	0	k__Fungi;p__Basidiomycota;c__Agaricomycetes;o__Russulales;f__Russulaceae;g__Lactarius;s__Lactarius serifluus
OTU_140	0.000302	4e-06	7e-06	7e-06	0	1.5e-05	k__Fungi;p__Ascomycota;c__Dothideomycetes;o__Dothideales;f__Dothioraceae;g__Aureobasidium;s__Aureobasidium pullulans
OTU_141	0	0.000224	0	0	0	0	k__Fungi;p__Basidiomycota;c__Agaricomycetes
OTU_142	0.000302	7e-06	0	4e-06	0	7e-06	k__Fungi;p__Ascomycota;c__Eurotiomycetes;o__Eurotiales;f__Trichocomaceae;g__Talaromyces
OTU_143	2.6e-05	0	0	0.000287	4e-06	2.2e-05	k__Fungi;p__Ascomycota;c__Sordariomycetes
OTU_144	0	0.000246	0	0	0	0	No blast hit
OTU_145	0.000533	2.6e-05	4e-06	1.5e-05	0	6.3e-05	k__Fungi;p__Ascomycota;c__Sordariomycetes;o__Hypocreales;f__Nectriaceae;g__Fusarium;s__Fusarium solani
OTU_146	0.00016	3.7e-05	0	0	0	0	k__Fungi;p__Ascomycota;c__Sordariomycetes;o__Coniochaetales;f__Coniochaetaceae
OTU_147	0	0	0	0	0.000325	0	k__Fungi;p__Ascomycota;c__Saccharomycetes;o__Saccharomycetales;f__Trichomonascaceae
OTU_148	0.00025	7e-06	0	0	4e-06	1.1e-05	k__Fungi;p__Ascomycota
OTU_149	0.00041	0	0	0	0	0	k__Fungi;p__Ascomycota;c__Incertae_sedis_Ascomycota;o__Incertae_sedis_Ascomycota;f__Pseudeurotiaceae;g__Pseudeurotium
OTU_150	0	0.000138	0	0	0	0	k__Fungi;p__Basidiomycota;c__Microbotryomycetes;o__Sporidiobolales;f__Incertae_sedis_Sporidiobolales;g__Rhodotorula
OTU_151	0	0	5.6e-05	4e-06	3.4e-05	0.000112	k__Fungi;p__Ascomycota;c__Dothideomycetes;o__Hysteriales;f__Gloniaceae
OTU_152	0.000224	0	0	0	0	0	k__Fungi;p__Ascomycota
OTU_153	4e-06	0	0	0	0.000242	1.9e-05	No blast hit
OTU_154	0	0	0.000224	0	0	0	No blast hit
OTU_155	0.000302	0	0	0	0	0	k__Fungi;p__Zygomycota;c__Incertae_sedis_Zygomycota;o__Mucorales;f__Rhizopodaceae;g__Rhizopus;s__Rhizopus arrhizus
OTU_156	1.1e-05	0	3.7e-05	4e-06	2.2e-05	0.000183	k__Fungi;p__Ascomycota;c__Sordariomycetes;o__Ophiostomatales;f__Ophiostomataceae
OTU_157	0.000205	0	7e-06	0	0	3.4e-05	k__Fungi;p__Ascomycota;c__Leotiomycetes;o__Incertae_sedis_Leotiomycetes;f__Myxotrichaceae;g__Oidiodendron
OTU_158	1.9e-05	9.7e-05	0	0	0	0	k__Fungi;p__Ascomycota;c__Sordariomycetes;o__Sordariales;f__Lasiosphaeriaceae;g__Cladorrhinum;s__Cladorrhinum bulbillosum
OTU_159	4.5e-05	0	0	3.4e-05	4.1e-05	7e-06	k__Fungi;p__Ascomycota;c__Eurotiomycetes;o__Chaetothyriales;f__Chaetothyriaceae;g__Cyphellophora;s__Cyphellophora sessilis
OTU_160	0.000183	2.6e-05	0	0	0	0	k__Fungi;p__Ascomycota;c__Saccharomycetes;o__Saccharomycetales;f__Incertae_sedis_Saccharomycetales
OTU_161	0	0	0	0	0	0.000145	No blast hit
OTU_162	0	0.000119	4e-06	0	0	4e-06	k__Fungi;p__Basidiomycota
OTU_163	0.00103	4e-06	0	0	1.5e-05	0	k__Fungi;p__Ascomycota;c__Eurotiomycetes;o__Eurotiales;f__Trichocomaceae
OTU_164	0.000175	1.1e-05	0	0	0	0	k__Fungi;p__Ascomycota;c__Sordariomycetes;o__Ophiostomatales;f__Ophiostomataceae
OTU_165	3e-05	0	0	7.5e-05	1.9e-05	4e-06	k__Fungi;p__Ascomycota;c__Dothideomycetes
OTU_166	0.000131	3.7e-05	7e-06	1.9e-05	6.7e-05	6e-05	k__Fungi;p__Basidiomycota;c__Incertae_sedis_Basidiomycota
OTU_167	0.000351	1.9e-05	0	0	0	0	k__Fungi;p__Basidiomycota;c__Agaricomycetes;o__Agaricales
OTU_168	0	0.000168	0	0	0	0	k__Fungi;p__Ascomycota;c__Saccharomycetes;o__Saccharomycetales;f__Lipomycetaceae;g__Lipomyces;s__Lipomyces japonicus
OTU_169	0.000175	0	0	0	0	0	k__Fungi;p__Ascomycota;c__Incertae_sedis_Ascomycota;o__Incertae_sedis_Ascomycota;f__Incertae_sedis_Ascomycota;g__Staphylotrichum;s__Staphylotrichum coccosporum
OTU_170	0.000522	7e-06	4.5e-05	0.00072	8.6e-05	0.004447	k__Fungi;p__Ascomycota;c__Eurotiomycetes;o__Eurotiales;f__Trichocomaceae;g__Penicillium;s__Penicillium brevicompactum
OTU_171	0.000228	0	0	0	0	0	k__Fungi;p__Ascomycota;c__Sordariomycetes;o__Microascales
OTU_172	0.000168	4e-06	0	0	0	4e-06	k__Fungi;p__Ascomycota;c__Eurotiomycetes;o__Eurotiales;f__Trichocomaceae;g__Talaromyces;s__Talaromyces radicus
OTU_173	0.000638	2.2e-05	0	0	0	0	k__Fungi;p__Basidiomycota;c__Agaricomycetes;o__Polyporales;f__Meripilaceae;g__Rigidoporus;s__Rigidoporus microporus
OTU_174	0.000205	0	0	0	0	0	k__Fungi;p__Ascomycota
OTU_175	0	0	2.6e-05	2.2e-05	4e-06	0.000175	No blast hit
OTU_176	0.000145	4e-06	0	0	2.2e-05	0	k__Fungi;p__Ascomycota;c__Eurotiomycetes;o__Eurotiales;f__Trichocomaceae;g__Aspergillus;s__Aspergillus penicillioides
OTU_177	0	0	1.1e-05	4.5e-05	0	9e-05	k__Fungi;p__Ascomycota;c__Eurotiomycetes;o__Eurotiales;f__Trichocomaceae;g__Penicillium;s__Penicillium daejeonium
OTU_178	0	0	0	0.000101	0	4e-06	k__Fungi;p__Basidiomycota;c__Exobasidiomycetes;o__Exobasidiales
OTU_179	0.000224	0	0	0	0	0	k__Fungi;p__Ascomycota;c__Sordariomycetes;o__Hypocreales;f__Incertae_sedis_Hypocreales
OTU_180	0.000123	7.8e-05	4e-06	0	0	7e-06	k__Fungi;p__Ascomycota;c__Sordariomycetes;o__Hypocreales;f__Nectriaceae
OTU_181	0	0	5.2e-05	4e-06	7e-06	3.4e-05	k__Fungi;p__Basidiomycota;c__Atractiellomycetes
OTU_182	0.000112	0	0	0	0	0	k__Fungi;p__Ascomycota;c__Saccharomycetes;o__Saccharomycetales;f__Pichiaceae;g__Hyphopichia;s__Hyphopichia burtonii
OTU_183	0.00016	0	0	0	0	0	k__Fungi;p__Ascomycota;c__Sordariomycetes;o__Sordariales;f__Lasiosphaeriaceae;g__Cercophora;s__Cercophora sparsa
OTU_184	0	0	0	0.000134	0	0	No blast hit
OTU_185	0.000108	7e-06	2.6e-05	0	0	1.1e-05	k__Fungi;p__Basidiomycota;c__Incertae_sedis_Basidiomycota;o__Incertae_sedis_Basidiomycota;f__Incertae_sedis_Basidiomycota
OTU_186	0	4.5e-05	0	0	0	4.5e-05	No blast hit
OTU_187	3e-05	4e-06	2.2e-05	7e-06	0	0	k__Fungi;p__Ascomycota;c__Leotiomycetes;o__Helotiales;f__Dermateaceae;g__Pezicula;s__Pezicula eucrita
OTU_188	0	0	0	4e-06	0	8.2e-05	k__Fungi;p__Basidiomycota;c__Tremellomycetes;o__Tremellales;f__Incertae_sedis_Tremellales;g__Cryptococcus;s__Cryptococcus oeirensis
OTU_189	0	6.3e-05	0	0	0	0	k__Fungi;p__Ascomycota;c__Dothideomycetes;o__Pleosporales;f__Incertae_sedis_Pleosporales
OTU_190	0	0	8.6e-05	0	0	0	No blast hit
OTU_191	0	0	0	4e-06	0.000134	0	No blast hit
OTU_192	1.9e-05	0	1.1e-05	0	6.7e-05	3.4e-05	k__Fungi;p__Ascomycota;c__Sordariomycetes;o__Ophiostomatales;f__Ophiostomataceae;g__Ophiostoma;s__Ophiostoma penicillatum
OTU_193	0	0.000127	0	0	0	7e-06	No blast hit
OTU_194	8.6e-05	0	0	0	0	0	No blast hit
OTU_195	0.000119	0	0	0	0	0	No blast hit
OTU_196	0	0	8.6e-05	0	0	3.4e-05	k__Fungi;p__Ascomycota;c__Sordariomycetes;o__Ophiostomatales;f__Ophiostomataceae;g__Ophiostoma;s__Ophiostoma saponiodorum
OTU_197	0	0	4.5e-05	7.1e-05	0	0	k__Fungi;p__Basidiomycota;c__Agaricomycetes;o__Agaricales;f__Clavariaceae;g__Clavulinopsis;s__Clavulinopsis laeticolor
OTU_198	0	4e-06	4e-06	0	0	9.7e-05	k__Fungi;p__Ascomycota;c__Saccharomycetes;o__Saccharomycetales;f__Pichiaceae;g__Ogataea;s__Ogataea cecidiorum
OTU_199	8.6e-05	4e-06	0	0	0	0	k__Fungi;p__Ascomycota;c__Saccharomycetes;o__Saccharomycetales;f__Pichiaceae;g__Pichia;s__Pichia manshurica
OTU_200	0	4e-06	0	0	4e-06	7.5e-05	No blast hit
OTU_201	8.6e-05	4e-06	0	7e-06	7e-06	3.4e-05	k__Fungi;p__Ascomycota;c__Sordariomycetes;o__Xylariales;f__Xylariaceae
OTU_202	1.9e-05	4.8e-05	0	7e-06	0	7e-06	k__Fungi;p__Ascomycota;c__Saccharomycetes;o__Saccharomycetales;f__Incertae_sedis_Saccharomycetales;g__Candida;s__Candida albicans
OTU_203	4e-06	0.004137	0	0	0	0	k__Fungi;p__Ascomycota;c__Sordariomycetes;o__Incertae_sedis_Sordariomycetes;f__Plectosphaerellaceae
OTU_204	0.000168	0	0	0	0	0	No blast hit
OTU_205	0	0	0.00028	0	0	0	No blast hit
OTU_206	1.5e-05	0.000104	0	0	0	0	k__Fungi;p__Basidiomycota;c__Agaricomycetes;o__Cantharellales;f__Ceratobasidiaceae
OTU_207	0.000112	0	0	0	0	0	k__Fungi;p__Ascomycota;c__Sordariomycetes
OTU_208	0.000201	4e-06	0	0	0	0	k__Fungi;p__Ascomycota;c__Leotiomycetes;o__Incertae_sedis_Leotiomycetes;f__Myxotrichaceae;g__Oidiodendron
OTU_209	0	5.2e-05	0	0	0	0	k__Fungi;p__Ascomycota;c__Sordariomycetes
OTU_210	8.2e-05	0	0	0	0	0	k__Fungi;p__Ascomycota
OTU_211	6.3e-05	0	0	0	0	0	k__Fungi;p__Basidiomycota;c__Microbotryomycetes;o__Sporidiobolales;f__Incertae_sedis_Sporidiobolales;g__Rhodotorula;s__Rhodotorula hylophila
OTU_212	0	7e-06	3.4e-05	6.3e-05	0	0	k__Fungi;p__Zygomycota;c__Incertae_sedis_Zygomycota;o__Mortierellales;f__Mortierellaceae;g__Mortierella;s__Mortierella humilis
OTU_213	4.1e-05	7e-06	0	7e-06	9e-05	1.1e-05	No blast hit
OTU_214	0	1.1e-05	8.2e-05	4e-06	0	4e-06	k__Fungi;p__Ascomycota;c__Sordariomycetes;o__Ophiostomatales;f__Ophiostomataceae
OTU_215	0	5.2e-05	0	0	0	0	k__Fungi;p__Ascomycota;c__Leotiomycetes
OTU_216	2.6e-05	4.1e-05	0	0	0	0	k__Fungi;p__Ascomycota;c__Sordariomycetes;o__Chaetosphaeriales;f__Chaetosphaeriaceae
OTU_217	0.000112	0	0	0	0	0	No blast hit
OTU_218	4.1e-05	4.5e-05	4e-06	0	4e-06	3.7e-05	k__Fungi;p__Ascomycota;c__Eurotiomycetes;o__Eurotiales;f__Trichocomaceae;g__Talaromyces
OTU_219	0	0	0	0	4.8e-05	0	k__Fungi;p__Ascomycota;c__Sordariomycetes
OTU_220	0	4.1e-05	0	0	0	0	k__Fungi;p__Ascomycota;c__Sordariomycetes;o__Ophiostomatales;f__Ophiostomataceae;g__Ophiostoma;s__Ophiostoma angusticollis
OTU_221	6.3e-05	7e-06	0	0	0	0	k__Fungi;p__Ascomycota;c__Sordariomycetes;o__Lulworthiales;f__Lulworthiaceae;g__Zalerion;s__Zalerion arboricola
OTU_222	9.7e-05	7e-06	0	0	0	0	k__Fungi;p__Ascomycota;c__Leotiomycetes;o__Helotiales;f__Incertae_sedis_Helotiales;g__Tetracladium;s__Tetracladium maxilliforme
OTU_223	0	0	4e-06	0	0	4.8e-05	k__Fungi;p__Ascomycota;c__Eurotiomycetes;o__Chaetothyriales;f__Herpotrichiellaceae
OTU_224	1.1e-05	0	1.5e-05	5.2e-05	3e-05	7e-06	k__Fungi;p__Basidiomycota;c__Tremellomycetes;o__Tremellales;f__Incertae_sedis_Tremellales;g__Cryptococcus;s__Cryptococcus podzolicus
OTU_225	4e-06	0	4e-06	0	0	4.5e-05	k__Fungi;p__Ascomycota;c__Leotiomycetes;o__Incertae_sedis_Leotiomycetes;f__Incertae_sedis_Leotiomycetes
OTU_226	0	1.5e-05	0	4.5e-05	2.2e-05	0	k__Fungi;p__Ascomycota;c__Saccharomycetes;o__Saccharomycetales;f__Lipomycetaceae
OTU_227	7e-06	0	0	0	3.4e-05	0	k__Fungi;p__Ascomycota;c__Lecanoromycetes;o__Umbilicariales;f__Umbilicariaceae;g__Xylopsora;s__Xylopsora caradocensis
OTU_228	9e-05	0	0	0	0	0	k__Fungi;p__Ascomycota;c__Sordariomycetes;o__Sordariales;f__Chaetomiaceae
OTU_229	0	4e-06	0	1.9e-05	2.2e-05	1.9e-05	k__Fungi;p__Ascomycota;c__Sordariomycetes;o__Hypocreales;f__Incertae_sedis_Hypocreales
OTU_230	0	4e-06	0	4e-06	7e-06	6.7e-05	k__Fungi;p__Basidiomycota;c__Agaricostilbomycetes;o__Agaricostilbales;f__Chionosphaeraceae;g__Chionosphaera;s__Chionosphaera cuniculicola
OTU_231	8.2e-05	0	0	0	0	0	No blast hit
OTU_232	0	0	0	0	4.5e-05	0	k__Fungi;p__Ascomycota;c__Sordariomycetes
OTU_233	7.5e-05	0	0	0	0	0	No blast hit
OTU_234	0	0	0	0	0.000101	0	No blast hit
OTU_235	0	0	5.6e-05	0	0	2.2e-05	k__Fungi;p__Ascomycota;c__Sordariomycetes
OTU_236	0	5.2e-05	0	0	0	0	k__Fungi;p__Ascomycota;c__Leotiomycetes
OTU_237	4.5e-05	0	0	0	0	0	k__Fungi;p__Ascomycota
OTU_238	0.000112	0	0	0	0	0	k__Fungi;p__Ascomycota;c__Eurotiomycetes;o__Eurotiales;f__Trichocomaceae;g__Penicillium
OTU_239	0	0.000381	0	0	0	0	No blast hit
OTU_240	9e-05	0	0	0	0	0	k__Fungi;p__Ascomycota;c__Pezizomycetes;o__Pezizales;f__Incertae_sedis_Pezizales
OTU_241	0	0	0	0	0	6.3e-05	k__Fungi;p__Ascomycota;c__Sordariomycetes;o__Ophiostomatales;f__Ophiostomataceae;g__Ceratocystiopsis;s__Ceratocystiopsis minuta
OTU_242	0	6.3e-05	0	0	0	0	k__Fungi;p__Basidiomycota;c__Agaricomycetes;o__Agaricales;f__Psathyrellaceae
OTU_243	0	3.7e-05	4e-06	0	0	0	k__Fungi;p__Ascomycota;c__Sordariomycetes
OTU_244	7.5e-05	0	0	0	0	0	No blast hit
OTU_245	0	0	4.1e-05	0	0	0	k__Fungi;p__Ascomycota;c__Eurotiomycetes;o__Chaetothyriales;f__Incertae_sedis_Chaetothyriales
OTU_246	0	5.6e-05	0	0	0	0	k__Fungi;p__Ascomycota;c__Eurotiomycetes
OTU_247	5.2e-05	0	4e-06	4e-06	0	0	k__Fungi;p__Ascomycota;c__Eurotiomycetes;o__Eurotiales;f__Trichocomaceae;g__Byssochlamys;s__Byssochlamys lagunculariae
OTU_248	0	0	2.2e-05	3.7e-05	0	0	No blast hit
OTU_249	0	0	0	7.1e-05	0	0	k__Fungi;p__Basidiomycota;c__Agaricomycetes;o__Agaricales;f__Psathyrellaceae;g__Coprinellus;s__Coprinellus radians
OTU_250	6e-05	0	0	0	0	0	k__Fungi;p__Ascomycota;c__Sordariomycetes
OTU_251	0	0	0	0	0.000145	4e-06	k__Fungi;p__Basidiomycota;c__Agaricomycetes;o__Agaricales;f__Hydnangiaceae
OTU_252	0	0	0	0.000119	0	0	No blast hit
OTU_253	4.5e-05	0	0	0	0	0	No blast hit
OTU_254	0	1.9e-05	0	0	0	0	k__Fungi;p__Ascomycota;c__Eurotiomycetes;o__Verrucariales;f__Verrucariaceae;g__Thelidium;s__Thelidium minutulum
OTU_255	8.2e-05	0	0	0	0	0	k__Fungi;p__Ascomycota
OTU_256	6.3e-05	0	0	0	0	0	k__Fungi;p__Ascomycota;c__Sordariomycetes;o__Hypocreales;f__Incertae_sedis_Hypocreales;g__Stachybotrys
OTU_257	0	0	0.000183	0	0	0	No blast hit
OTU_258	4e-06	0	2.6e-05	1.5e-05	7e-06	4e-06	k__Fungi;p__Ascomycota
OTU_259	3.7e-05	0	0	0	0	0	No blast hit
OTU_260	0	0	3.4e-05	1.1e-05	6e-05	1.5e-05	No blast hit
OTU_261	3.7e-05	0	0	0	0	0	No blast hit
OTU_262	1.5e-05	0	1.1e-05	4e-06	7e-06	1.1e-05	k__Fungi;p__Ascomycota;c__Saccharomycetes;o__Saccharomycetales;f__Incertae_sedis_Saccharomycetales;g__Candida;s__Candida parapsilosis
OTU_263	0	0	0	0	0	4.1e-05	k__Fungi;p__Ascomycota;c__Eurotiomycetes;o__Eurotiales;f__Trichocomaceae;g__Penicillium
OTU_264	0	2.6e-05	0	0	0	0	k__Fungi;p__Zygomycota;c__Incertae_sedis_Zygomycota;o__Mortierellales;f__Mortierellaceae
OTU_265	0	0	3.7e-05	0	0	0	No blast hit
OTU_266	4.1e-05	0	0	0	0	0	k__Fungi;p__Ascomycota;c__Incertae_sedis_Ascomycota;o__Incertae_sedis_Ascomycota;f__Incertae_sedis_Ascomycota
OTU_267	0	0	1.1e-05	0.000175	7e-06	0	No blast hit
OTU_268	3e-05	0	0	0	0	0	No blast hit
OTU_269	0	0	2.2e-05	0	1.1e-05	4e-06	k__Fungi;p__Ascomycota
OTU_270	9e-05	0	0	0	0	0	k__Fungi;p__Ascomycota;c__Sordariomycetes;o__Hypocreales;f__Incertae_sedis_Hypocreales
OTU_271	2.6e-05	0	0	4e-06	0	0	k__Fungi
OTU_272	0	0	0	0	3e-05	0	No blast hit
OTU_273	0	1.9e-05	7e-06	0	0	0	k__Fungi
OTU_274	0.000205	0	0	0	0	0	k__Fungi;p__Ascomycota;c__Saccharomycetes;o__Saccharomycetales;f__Pichiaceae;g__Issatchenkia;s__Issatchenkia terricola
OTU_275	4.1e-05	0	0	0	0	0	k__Fungi;p__Ascomycota
OTU_276	8.2e-05	0	0	0	0	0	k__Fungi;p__Ascomycota;c__Saccharomycetes;o__Saccharomycetales;f__Incertae_sedis_Saccharomycetales;g__Candida;s__Candida pseudolambica
OTU_277	4.5e-05	7e-06	7e-06	0	0	0	k__Fungi;p__Ascomycota;c__Saccharomycetes;o__Saccharomycetales
OTU_278	6.7e-05	0	0	0	0	0	k__Fungi;p__Ascomycota
OTU_279	6e-05	0	0	0	0	0	k__Fungi;p__Basidiomycota;c__Agaricomycetes;o__Thelephorales
OTU_280	4.5e-05	0	0	0	0	0	k__Fungi;p__Ascomycota
OTU_281	2.2e-05	1.5e-05	0	0	3e-05	0	k__Fungi;p__Ascomycota;c__Saccharomycetes;o__Saccharomycetales;f__Saccharomycopsidaceae;g__Saccharomycopsis;s__Saccharomycopsis crataegensis
OTU_282	0	7e-06	1.5e-05	0	0	0	k__Fungi;p__Basidiomycota;c__Tremellomycetes;o__Tremellales;f__Incertae_sedis_Tremellales
OTU_283	3.4e-05	0	0	0	0	0	k__Fungi;p__Ascomycota;c__Dothideomycetes
OTU_284	0	0	0	5.6e-05	0	0	k__Fungi;p__Basidiomycota;c__Agaricomycetes
OTU_285	0	0	1.1e-05	3.7e-05	0	0	k__Fungi;p__Ascomycota;c__Leotiomycetes;o__Helotiales;f__Hyaloscyphaceae;g__Bryoglossum;s__Bryoglossum gracile
OTU_286	2.6e-05	1.1e-05	4e-06	0	0	0	k__Fungi;p__Ascomycota
OTU_287	0.000112	1.5e-05	0	0	0	0	k__Fungi;p__Basidiomycota;c__Agaricomycetes;o__Cantharellales;f__Clavulinaceae
OTU_288	0	0	7e-06	0.000134	1.1e-05	0	No blast hit
OTU_289	0	0	2.6e-05	0	7e-06	0	k__Fungi;p__Basidiomycota;c__Microbotryomycetes;o__Sporidiobolales;f__Incertae_sedis_Sporidiobolales;g__Sporobolomyces;s__Sporobolomyces roseus
OTU_290	0	0	0	4.5e-05	0	0	k__Fungi;p__Ascomycota;c__Sordariomycetes;o__Ophiostomatales;f__Ophiostomataceae
OTU_291	4e-06	1.5e-05	4e-06	4e-06	4e-06	0	k__Fungi
OTU_292	0	3.7e-05	0	0	0	0	No blast hit
OTU_293	4.1e-05	0	0	0	0	0	k__Fungi;p__Basidiomycota;c__Agaricomycetes;o__Agaricales;f__Agaricaceae
OTU_294	0	0	0	4.5e-05	0	0	k__Fungi;p__Ascomycota;c__Eurotiomycetes
OTU_295	6.3e-05	0	0	0	0	0	No blast hit
OTU_296	1.5e-05	1.5e-05	0	0	7e-06	0	k__Fungi;p__Ascomycota;c__Sordariomycetes;o__Hypocreales;f__Hypocreaceae;g__Trichoderma
OTU_297	0	0	0	0	0	7e-06	No blast hit
OTU_298	3.4e-05	0	0	0	0	0	No blast hit
OTU_299	6.7e-05	0	0	0	0	4e-06	k__Fungi;p__Ascomycota;c__Eurotiomycetes;o__Eurotiales;f__Trichocomaceae;g__Penicillium
OTU_300	0	1.5e-05	0	0	0	0	k__Fungi;p__Ascomycota
OTU_301	0	0	0	0	0	2.2e-05	k__Fungi;p__Basidiomycota;c__Agaricomycetes;o__Agaricales;f__Entolomataceae
OTU_302	0	0	1.5e-05	0	4e-06	0	k__Fungi;p__Ascomycota;c__Saccharomycetes;o__Saccharomycetales;f__Trichomonascaceae
OTU_303	0	0	4e-06	4.1e-05	0	0	No blast hit
OTU_304	3.7e-05	0	4e-06	0	0	0	k__Fungi;p__Basidiomycota;c__Agaricomycetes;o__Cantharellales;f__Hydnaceae;g__Sistotrema;s__Sistotrema brinkmannii
OTU_305	0	0	2.2e-05	1.5e-05	0	0	k__Fungi;p__Ascomycota
OTU_306	0	0	2.6e-05	0	0	0	k__Fungi;p__Ascomycota;c__Leotiomycetes;o__Rhytismatales;f__Rhytismataceae;g__Therrya;s__Therrya fuckelii
OTU_307	6.3e-05	0	0	0	0	0	k__Fungi;p__Ascomycota;c__Pezizomycetes;o__Pezizales;f__Pyronemataceae;g__Scutellinia
OTU_308	0	0	0	2.2e-05	0	0	k__Fungi;p__Ascomycota;c__Leotiomycetes
OTU_309	4.8e-05	0	0	0	0	0	k__Fungi;p__Ascomycota;c__Sordariomycetes;o__Hypocreales;f__Incertae_sedis_Hypocreales
OTU_310	3e-05	0	0	0	0	0	k__Fungi;p__Ascomycota
OTU_311	0	1.9e-05	0	0	0	0	k__Fungi;p__Ascomycota
OTU_312	0	1.9e-05	0	0	0	0	No blast hit
OTU_313	0.000108	0	0	0	0	0	k__Fungi;p__Ascomycota;c__Eurotiomycetes;o__Eurotiales;f__Trichocomaceae;g__Aspergillus;s__Aspergillus penicillioides
OTU_314	0	2.2e-05	0	0	0	0	No blast hit
OTU_315	0	2.6e-05	0	0	0	0	k__Fungi;p__Ascomycota;c__Sordariomycetes
OTU_316	5.2e-05	0	0	0	0	0	k__Fungi;p__Basidiomycota;c__Agaricomycetes;o__Russulales;f__Russulaceae
OTU_317	0	0	7e-06	1.9e-05	0	0	k__Fungi;p__Ascomycota;c__Leotiomycetes
OTU_318	0	0	3e-05	0	0	0	k__Fungi;p__Ascomycota;c__Orbiliomycetes;o__Orbiliales;f__Orbiliaceae
OTU_319	4.8e-05	0	0	0	0	0	k__Fungi;p__Ascomycota;c__Saccharomycetes;o__Saccharomycetales;f__Dipodascaceae;g__Geotrichum;s__Geotrichum europaeum
OTU_320	9.3e-05	0	0	0	0	0	No blast hit
OTU_321	4e-06	4e-06	0	7e-06	4e-06	0	k__Fungi;p__Ascomycota;c__Eurotiomycetes
OTU_322	0	0	0	0	2.2e-05	0	k__Fungi;p__Ascomycota;c__Leotiomycetes;o__Helotiales;f__Vibrisseaceae;g__Acephala;s__Acephala applanata
OTU_323	0	0	0	0	0	2.6e-05	k__Fungi;p__Ascomycota;c__Dothideomycetes;o__Pleosporales
OTU_324	4.1e-05	0	0	0	0	0	k__Fungi;p__Zygomycota;c__Incertae_sedis_Zygomycota;o__Mortierellales;f__Mortierellaceae
OTU_325	3.4e-05	7e-06	0	0	0	0	k__Fungi;p__Basidiomycota;c__Agaricomycetes;o__Agaricales;f__Mycenaceae
OTU_326	0	2.2e-05	0	0	0	0	k__Fungi;p__Ascomycota;c__Sordariomycetes;o__Xylariales;f__Incertae_sedis_Xylariales;g__Monographella;s__Monographella stoveri
OTU_327	0	1.1e-05	0	0	0	0	k__Fungi;p__Ascomycota;c__Sordariomycetes;o__Incertae_sedis_Sordariomycetes;f__Plectosphaerellaceae;g__Musicillium;s__Musicillium theobromae
OTU_328	1.5e-05	0	0	0	0	0	k__Fungi;p__Ascomycota;c__Leotiomycetes;o__Helotiales
OTU_329	0	0	0	0	4e-06	1.1e-05	k__Fungi;p__Basidiomycota;c__Agaricomycetes;o__Atheliales
OTU_330	2.2e-05	7e-06	0	0	0	0	k__Fungi;p__Ascomycota;c__Leotiomycetes
OTU_331	0	0	0	0	0	4.8e-05	k__Fungi;p__Ascomycota;c__Sordariomycetes;o__Hypocreales;f__Cordycipitaceae
OTU_332	3.4e-05	0	0	0	0	0	k__Fungi;p__Ascomycota;c__Leotiomycetes;o__Leotiales;f__Leotiaceae
OTU_333	2.2e-05	0	0	0	0	0	k__Fungi;p__Ascomycota;c__Incertae_sedis_Ascomycota;o__Incertae_sedis_Ascomycota;f__Incertae_sedis_Ascomycota
OTU_334	1.5e-05	0	0	0	0	1.1e-05	k__Fungi;p__Basidiomycota;c__Agaricomycetes
OTU_335	2.2e-05	0	0	0	0	0	No blast hit
OTU_336	2.2e-05	7e-06	0	0	4e-06	0	k__Fungi;p__Ascomycota;c__Sordariomycetes;o__Sordariales;f__Lasiosphaeriaceae;g__Cercophora;s__Cercophora coprophila
OTU_337	0	0	0	0	2.6e-05	1.1e-05	No blast hit
OTU_338	0	0	0	2.2e-05	0	0	No blast hit
OTU_339	0	0.351594	0	0	0	0	No blast hit
OTU_340	1.1e-05	0	0	2.2e-05	0	0	k__Fungi;p__Ascomycota;c__Sordariomycetes;o__Hypocreales;f__Incertae_sedis_Hypocreales;g__Myrothecium;s__Myrothecium verrucaria
OTU_341	0	0	0	0	0	1.1e-05	k__Fungi;p__Basidiomycota;c__Microbotryomycetes;o__Sporidiobolales;f__Incertae_sedis_Sporidiobolales
OTU_342	1.9e-05	1.1e-05	0	0	0	0	k__Fungi;p__Ascomycota;c__Eurotiomycetes;o__Eurotiales;f__Trichocomaceae;g__Aspergillus
OTU_343	3.7e-05	1.1e-05	0	0	0	0	k__Fungi;p__Ascomycota;c__Eurotiomycetes;o__Eurotiales;f__Trichocomaceae;g__Aspergillus
OTU_344	0	0	0	0	1.5e-05	0	No blast hit
OTU_345	3.7e-05	0	0	0	0	0	k__Fungi;p__Ascomycota;c__Leotiomycetes;o__Helotiales;f__Incertae_sedis_Helotiales
OTU_346	1.9e-05	0	0	0	0	0	k__Fungi;p__Ascomycota;c__Leotiomycetes;o__Helotiales;f__Incertae_sedis_Helotiales;g__Scytalidium;s__Scytalidium lignicola
OTU_347	0	0	0	1.5e-05	0	0	No blast hit
OTU_348	4.5e-05	0	0	0	0	0	No blast hit
OTU_349	1.5e-05	0	1.5e-05	0	0	0	k__Fungi;p__Zygomycota;c__Incertae_sedis_Zygomycota;o__Mucorales;f__Mucoraceae;g__Mucor;s__Mucor plumbeus
OTU_350	0	0	0	1.9e-05	0	0	k__Fungi;p__Ascomycota;c__Eurotiomycetes
OTU_351	4.1e-05	0	0	0	0	0	k__Fungi;p__Ascomycota;c__Sordariomycetes;o__Hypocreales;f__Nectriaceae;g__Thelonectria;s__Thelonectria olida
OTU_352	4.5e-05	0	4e-06	2.2e-05	0	0	k__Fungi;p__Ascomycota;c__Eurotiomycetes
OTU_353	0	0	9.3e-05	0	0	0	No blast hit
OTU_354	6e-05	7e-06	0	0	0	1.1e-05	k__Fungi;p__Ascomycota;c__Saccharomycetes;o__Saccharomycetales;f__Saccharomycetaceae;g__Saccharomyces;s__Saccharomyces cerevisiae
OTU_355	0	0	0	0	1.9e-05	0	k__Fungi;p__Basidiomycota;c__Agaricomycetes
OTU_356	0	0	3.7e-05	0	0	0	No blast hit
OTU_357	0	7e-06	0	0	1.1e-05	7e-06	No blast hit
OTU_358	0	7e-06	0	0	1.1e-05	7e-06	No blast hit
OTU_359	0.000112	4e-06	0	7e-06	5.2e-05	2.2e-05	k__Fungi;p__Basidiomycota;c__Incertae_sedis_Basidiomycota;o__Malasseziales;f__Malasseziaceae;g__Malassezia;s__Malassezia globosa
OTU_360	0	1.1e-05	0	0	0	0	k__Fungi;p__Ascomycota;c__Eurotiomycetes;o__Chaetothyriales
OTU_361	4.1e-05	0	0	0	0	0	No blast hit
OTU_362	1.1e-05	0	0	0	7e-06	4e-06	No blast hit
OTU_363	0	1.9e-05	0	0	0	0	k__Fungi;p__Ascomycota;c__Sordariomycetes;o__Ophiostomatales;f__Ophiostomataceae;g__Pesotum;s__Pesotum piceae
OTU_364	7e-06	5.2e-05	0	0	0	0	No blast hit
OTU_365	0	1.1e-05	0	0	0	0	k__Fungi;p__Ascomycota;c__Leotiomycetes;o__Helotiales
OTU_366	0	4.8e-05	7e-06	0	0	4e-06	k__Fungi;p__Ascomycota;c__Dothideomycetes;o__Pleosporales;f__Pleosporaceae;g__Alternaria;s__Alternaria pluriseptata
OTU_367	6e-05	0	0	0	0	0	k__Fungi
OTU_368	2.6e-05	0	4e-06	2.2e-05	0	0	k__Fungi;p__Ascomycota;c__Sordariomycetes;o__Hypocreales;f__Incertae_sedis_Hypocreales
OTU_369	2.6e-05	0	0	0	0	0	k__Fungi;p__Ascomycota;c__Saccharomycetes;o__Saccharomycetales;f__Incertae_sedis_Saccharomycetales
OTU_370	0	0	0	0	0	1.9e-05	k__Fungi;p__Basidiomycota;c__Pucciniomycetes
OTU_371	3.7e-05	0	0	0	0	0	No blast hit
OTU_372	0	0	7e-06	0.000507	7e-06	1.9e-05	No blast hit
OTU_373	0.000519	4e-06	9.3e-05	0.000623	0.000138	0.001183	k__Fungi;p__Ascomycota;c__Eurotiomycetes;o__Eurotiales;f__Trichocomaceae;g__Penicillium;s__Penicillium lenticrescens
OTU_374	5.6e-05	0	0	0	0	0	k__Fungi;p__Ascomycota;c__Saccharomycetes;o__Saccharomycetales;f__Incertae_sedis_Saccharomycetales;g__Candida;s__Candida glabrata
OTU_375	1.5e-05	0	4e-06	0	4e-06	1.1e-05	k__Fungi;p__Ascomycota;c__Leotiomycetes;o__Helotiales;f__Helotiaceae
OTU_376	0	0	0	0	9e-05	0	k__Fungi;p__Ascomycota;c__Dothideomycetes;o__Hysteriales
OTU_377	0	0	0	0	3.7e-05	0	No blast hit
OTU_378	0	0	0	0	0	1.9e-05	k__Fungi;p__Ascomycota;c__Leotiomycetes
OTU_379	4.1e-05	0	0	0	0	0	No blast hit
OTU_380	2.2e-05	0	0	0	0	0	k__Fungi;p__Ascomycota;c__Sordariomycetes;o__Hypocreales;f__Incertae_sedis_Hypocreales;g__Emericellopsis
OTU_381	0	0	0	1.9e-05	0	0	k__Fungi;p__Basidiomycota;c__Tremellomycetes;o__Tremellales;f__Incertae_sedis_Tremellales;g__Tremella;s__Tremella diploschistina
OTU_382	2.6e-05	0	0	4e-06	7e-06	7e-06	No blast hit
OTU_383	0	2.2e-05	0	0	0	0	k__Fungi;p__Zygomycota;c__Incertae_sedis_Zygomycota;o__Mortierellales;f__Mortierellaceae;g__Mortierella;s__Mortierella hyalina
OTU_384	0	0	3e-05	0	0	0	k__Fungi;p__Ascomycota;c__Sordariomycetes;o__Hypocreales;f__Nectriaceae;g__Pseudocosmospora;s__Pseudocosmospora vilior
OTU_385	3.7e-05	0	0	0	0	0	k__Fungi;p__Basidiomycota;c__Wallemiomycetes;o__Wallemiales;f__Wallemiaceae
OTU_386	3.7e-05	0	1.9e-05	0	0	0	k__Fungi;p__Ascomycota;c__Sordariomycetes;o__Hypocreales;f__Incertae_sedis_Hypocreales;g__Acremonium;s__Acremonium polychromum
OTU_387	0	0	0	2.2e-05	0	0	k__Fungi;p__Ascomycota;c__Sordariomycetes;o__Ophiostomatales;f__Ophiostomataceae
OTU_388	0.085734	0.000116	0	0	0	0	No blast hit
OTU_389	4e-06	1.1e-05	0	0	0	0	k__Fungi;p__Basidiomycota;c__Agaricomycetes;o__Agaricales
OTU_390	7e-06	1.1e-05	4e-06	4e-06	0	0	k__Fungi;p__Ascomycota;c__Dothideomycetes;o__Pleosporales;f__Pleosporaceae;g__Alternaria
OTU_391	3e-05	0	4e-06	1.1e-05	7e-06	0	k__Fungi;p__Ascomycota;c__Incertae_sedis_Ascomycota;o__Incertae_sedis_Ascomycota;f__Incertae_sedis_Ascomycota;g__Staphylotrichum;s__Staphylotrichum boninense
OTU_392	0	4e-06	4e-06	4e-06	4.1e-05	0	No blast hit
OTU_393	0	0	0	1.1e-05	0	0	k__Fungi;p__Zygomycota;c__Incertae_sedis_Zygomycota;o__Mortierellales;f__Mortierellaceae
OTU_394	2.2e-05	0	0	0	0	0	k__Fungi;p__Chytridiomycota;c__Chytridiomycetes;o__Spizellomycetales;f__Spizellomycetaceae;g__Spizellomyces;s__Spizellomyces dolichospermus
OTU_395	3.4e-05	0	0	0	0	0	k__Fungi;p__Basidiomycota;c__Tremellomycetes;o__Tremellales;f__Incertae_sedis_Tremellales
OTU_396	0	0	4e-06	3e-05	0	0	No blast hit
OTU_397	3.4e-05	4e-06	7e-06	0	0	0	k__Fungi;p__Ascomycota
OTU_398	2.2e-05	0	0	0	0	0	No blast hit
OTU_399	0	0	0	1.5e-05	0	0	k__Fungi;p__Ascomycota;c__Dothideomycetes;o__Capnodiales;f__Teratosphaeriaceae;g__Neocatenulostroma;s__Neocatenulostroma germanicum
OTU_400	1.5e-05	4e-06	0	0	0	0	k__Fungi;p__Ascomycota;c__Sordariomycetes;o__Hypocreales
OTU_401	1.5e-05	0	0	0	0	0	k__Fungi;p__Ascomycota;c__Eurotiomycetes
OTU_402	4e-06	0	1.1e-05	3e-05	0	0	k__Fungi;p__Zygomycota;c__Incertae_sedis_Zygomycota;o__Mortierellales;f__Mortierellaceae;g__Mortierella;s__Mortierella minutissima
OTU_403	1.9e-05	0	0	0	0	0	k__Fungi;p__Basidiomycota;c__Agaricomycetes;o__Agaricales;f__Mycenaceae;g__Mycena
OTU_404	0	0	0	0	4e-06	7e-06	k__Fungi;p__Ascomycota;c__Dothideomycetes
OTU_405	0	0	2.2e-05	0	0	0	k__Fungi;p__Ascomycota;c__Sordariomycetes;o__Ophiostomatales;f__Ophiostomataceae
OTU_406	0	0	0	0	1.5e-05	0	k__Fungi;p__Ascomycota
OTU_407	0	0	2.2e-05	0	0	0	No blast hit
OTU_408	3.4e-05	0	0	0	0	0	k__Fungi;p__Ascomycota;c__Leotiomycetes;o__Helotiales;f__Dermateaceae;g__Rhizodermea;s__Rhizodermea veluwensis
OTU_409	0	0	0	0	7e-06	4e-06	No blast hit
OTU_410	4.5e-05	0	0	0	0	0	k__Fungi;p__Ascomycota;c__Dothideomycetes
OTU_411	0	0	4e-06	0	0	1.5e-05	k__Fungi;p__Zygomycota;c__Incertae_sedis_Zygomycota;o__Mucorales;f__Cunninghamellaceae;g__Absidia;s__Absidia glauca
OTU_412	4e-06	4e-06	0	0	0	0	k__Fungi;p__Zygomycota;c__Incertae_sedis_Zygomycota;o__Mortierellales;f__Mortierellaceae;g__Mortierella;s__Mortierella exigua
OTU_413	0	0	0.000276	4e-06	0	0	No blast hit
OTU_414	1.9e-05	0	0	1.1e-05	0	0	k__Fungi;p__Ascomycota;c__Saccharomycetes;o__Saccharomycetales;f__Incertae_sedis_Saccharomycetales
OTU_415	4e-06	7e-06	0	0	0	4e-06	k__Fungi;p__Ascomycota;c__Incertae_sedis_Ascomycota;o__Incertae_sedis_Ascomycota;f__Incertae_sedis_Ascomycota
OTU_416	4e-06	4e-06	0	0	4e-06	1.1e-05	k__Fungi;p__Basidiomycota;c__Tremellomycetes;o__Tremellales;f__Incertae_sedis_Tremellales;g__Cryptococcus;s__Cryptococcus victoriae
OTU_417	0	0	0	2.2e-05	0	4e-06	No blast hit
OTU_418	0	0	4e-06	0	0	4e-06	k__Fungi;p__Basidiomycota;c__Tremellomycetes;o__Tremellales;f__Incertae_sedis_Tremellales
OTU_419	5.6e-05	0	0	0	0	0	k__Fungi;p__Basidiomycota;c__Agaricostilbomycetes;o__Agaricostilbales;f__Agaricostilbaceae;g__Sterigmatomyces;s__Sterigmatomyces halophilus
OTU_420	1.1e-05	0	0	0	0	0	k__Fungi;p__Ascomycota;c__Pezizomycetes;o__Pezizales
OTU_421	6.3e-05	7e-06	0	0	0	0	k__Fungi;p__Basidiomycota;c__Agaricomycetes;o__Russulales;f__Russulaceae
OTU_422	0	0	0	0	0	7e-06	k__Fungi;p__Ascomycota
OTU_423	0	0	0	4e-06	0	7e-06	k__Fungi;p__Ascomycota;c__Lecanoromycetes;o__Lecanorales
OTU_424	1.1e-05	7e-06	0	0	0	0	k__Fungi;p__Ascomycota
OTU_425	0	0	0	1.5e-05	0	0	No blast hit
OTU_426	0	7e-06	0	0	0	0	k__Fungi;p__Ascomycota;c__Sordariomycetes;o__Xylariales;f__Amphisphaeriaceae;g__Discosia
OTU_427	1.1e-05	0	0	0	0	0	k__Fungi;p__Ascomycota;c__Incertae_sedis_Ascomycota;o__Incertae_sedis_Ascomycota;f__Incertae_sedis_Ascomycota;g__Atractium;s__Atractium crassum
OTU_428	0	0	0	0	7e-06	0	k__Fungi;p__Basidiomycota;c__Cystobasidiomycetes;o__Erythrobasidiales;f__Incertae_sedis_Erythrobasidiales;g__Erythrobasidium;s__Erythrobasidium hasegawianum
OTU_429	3.4e-05	0	4e-06	0	0	0	k__Fungi;p__Ascomycota;c__Eurotiomycetes;o__Eurotiales;f__Trichocomaceae
OTU_430	0	7e-06	0	0	0	0	k__Fungi;p__Ascomycota;c__Sordariomycetes;o__Sordariales;f__Chaetomiaceae
OTU_431	3e-05	0	0	0	0	0	No blast hit
OTU_432	2.2e-05	0	0	0	0	1.1e-05	k__Fungi;p__Ascomycota;c__Eurotiomycetes;o__Chaetothyriales;f__Herpotrichiellaceae
OTU_433	0	4e-06	0	0	0	0	k__Fungi;p__Ascomycota;c__Pezizomycetes;o__Pezizales;f__Sarcosomataceae;g__Donadinia;s__Donadinia seaveri
OTU_434	0	4e-06	0	0	0	0	k__Fungi;p__Basidiomycota;c__Agaricomycetes;o__Hymenochaetales;f__Schizoporaceae;g__Hyphodontia;s__Hyphodontia quercina
OTU_435	1.1e-05	0	0	0	0	0	No blast hit
OTU_436	1.1e-05	0	0	0	0	0	k__Fungi;p__Ascomycota;c__Leotiomycetes;o__Helotiales;f__Incertae_sedis_Helotiales
OTU_437	0	1.9e-05	0	0	0	0	k__Fungi;p__Basidiomycota;c__Tremellomycetes;o__Tremellales;f__Incertae_sedis_Tremellales;g__Tremella;s__Tremella encephala
OTU_438	1.9e-05	0	0	0	0	0	k__Fungi;p__Basidiomycota;c__Agaricomycetes;o__Agaricales;f__Psathyrellaceae;g__Psathyrella;s__Psathyrella candolleana
OTU_439	3e-05	0	0	0	0	0	k__Fungi;p__Ascomycota;c__Eurotiomycetes;o__Verrucariales;f__Verrucariaceae
OTU_440	0	0	0	4e-06	7e-06	0	k__Fungi;p__Ascomycota;c__Leotiomycetes
OTU_441	0	0	4e-06	4e-06	0	0	k__Fungi;p__Ascomycota;c__Leotiomycetes;o__Incertae_sedis_Leotiomycetes;f__Incertae_sedis_Leotiomycetes
OTU_442	1.1e-05	1.9e-05	0	0	0	0	k__Fungi;p__Ascomycota;c__Eurotiomycetes;o__Chaetothyriales;f__Herpotrichiellaceae;g__Phialophora;s__Phialophora cyclaminis
OTU_443	3.4e-05	0	0	0	0	0	k__Fungi;p__Zygomycota;c__Incertae_sedis_Zygomycota;o__Mortierellales;f__Mortierellaceae
OTU_444	0	3.4e-05	0	0	0	0	k__Fungi;p__Ascomycota;c__Saccharomycetes;o__Saccharomycetales;f__Incertae_sedis_Saccharomycetales;g__Cyberlindnera;s__Cyberlindnera veronae
OTU_445	1.1e-05	0	1.5e-05	0	4e-06	1.1e-05	k__Fungi;p__Chytridiomycota;c__Chytridiomycetes;o__Spizellomycetales
OTU_446	0	0	4e-06	1.1e-05	2.2e-05	0	k__Fungi;p__Basidiomycota;c__Agaricomycetes;o__Sebacinales;f__Sebacinales Group B;g__Piriformospora;s__Piriformospora indica
OTU_447	0	1.9e-05	0	0	0	0	k__Fungi;p__Basidiomycota;c__Tremellomycetes;o__Tremellales;f__Incertae_sedis_Tremellales
OTU_448	1.9e-05	0	0	0	0	0	k__Fungi;p__Ascomycota
OTU_449	0	4e-06	0	0	4e-06	0	k__Fungi;p__Ascomycota;c__Dothideomycetes;o__Incertae_sedis_Dothideomycetes;f__Incertae_sedis_Dothideomycetes;g__Septoriella;s__Septoriella oudemansii
OTU_450	1.1e-05	0	0	0	0	0	k__Fungi;p__Ascomycota
OTU_451	0	0	0	0	0	7e-06	k__Fungi;p__Ascomycota;c__Dothideomycetes;o__Botryosphaeriales
OTU_452	0	0	7e-06	0	0	0	k__Fungi;p__Ascomycota
OTU_453	1.5e-05	0	0	0	0	0	No blast hit
OTU_454	2.2e-05	4e-06	0	0	0	0	k__Fungi;p__Ascomycota
OTU_455	2.2e-05	0	0	0	0	0	No blast hit
OTU_456	0	0	0	0	2.6e-05	0	No blast hit
OTU_457	2.2e-05	0	0	0	0	0	k__Fungi;p__Ascomycota
OTU_458	0	0	0	0	0	0	k__Fungi;p__Ascomycota;c__Leotiomycetes;o__Incertae_sedis_Leotiomycetes;f__Incertae_sedis_Leotiomycetes;g__Chaetomella;s__Chaetomella raphigera
OTU_459	0	0	0	0	4e-06	7e-06	k__Fungi;p__Basidiomycota;c__Agaricomycetes;o__Atheliales;f__Atheliaceae;g__Tylospora;s__Tylospora fibrillosa
OTU_460	2.6e-05	0	0	0	0	0	No blast hit
OTU_461	0	7e-06	0	0	0	0	No blast hit
OTU_462	6e-05	0	0	0	0	0	k__Fungi;p__Ascomycota;c__Sordariomycetes;o__Sordariales;f__Chaetomiaceae;g__Chaetomium;s__Chaetomium piluliferum
OTU_463	0	0	0	0	7e-06	0	k__Fungi;p__Ascomycota;c__Geoglossomycetes
OTU_464	7e-06	0	0	0	0	0	No blast hit
OTU_465	0	0	0	1.9e-05	1.1e-05	0	No blast hit
OTU_466	2.2e-05	4e-06	0	0	0	0	k__Fungi;p__Ascomycota;c__Leotiomycetes;o__Incertae_sedis_Leotiomycetes;f__Incertae_sedis_Leotiomycetes;g__Leohumicola;s__Leohumicola minima
OTU_467	1.1e-05	0	0	0	0	0	k__Fungi;p__Ascomycota;c__Sordariomycetes;o__Hypocreales;f__Nectriaceae;g__Gibberella
OTU_468	1.1e-05	4e-06	0	0	0	0	k__Fungi;p__Ascomycota;c__Sordariomycetes;o__Incertae_sedis_Sordariomycetes;f__Plectosphaerellaceae
OTU_469	0	4e-06	0	0	0	2.2e-05	k__Fungi;p__Ascomycota;c__Saccharomycetes;o__Saccharomycetales;f__Debaryomycetaceae;g__Meyerozyma
OTU_470	7e-06	0	0	0	0	0	k__Fungi;p__Ascomycota;c__Sordariomycetes;o__Hypocreales;f__Bionectriaceae
OTU_471	0	4e-06	4e-06	0	0	0	k__Fungi;p__Basidiomycota;c__Atractiellomycetes
OTU_472	1.1e-05	0	0	0	0	0	k__Fungi;p__Ascomycota;c__Saccharomycetes;o__Saccharomycetales;f__Incertae_sedis_Saccharomycetales;g__Starmerella;s__Starmerella bacillaris
OTU_473	0	0	0	7e-06	0	0	k__Fungi;p__Ascomycota;c__Lecanoromycetes;o__Umbilicariales;f__Umbilicariaceae;g__Fulgidea;s__Fulgidea sierrae
OTU_474	0	0	0	1.5e-05	0	0	k__Fungi;p__Basidiomycota;c__Tremellomycetes;o__Tremellales;f__Incertae_sedis_Tremellales
OTU_475	0	0	0	0	1.1e-05	4e-06	No blast hit
OTU_476	0	0	0	0	7e-06	0	k__Fungi;p__Basidiomycota;c__Microbotryomycetes;o__Sporidiobolales;f__Incertae_sedis_Sporidiobolales;g__Rhodotorula;s__Rhodotorula philyla
OTU_477	7e-06	0	0	0	0	0	k__Fungi;p__Ascomycota;c__Sordariomycetes;o__Hypocreales;f__Hypocreaceae;g__Lichenobarya;s__Lichenobarya usneae
OTU_478	0	0	0	1.1e-05	0	0	k__Fungi;p__Basidiomycota;c__Tremellomycetes;o__Tremellales;f__Incertae_sedis_Tremellales
OTU_479	1.9e-05	0	4e-06	1.1e-05	7e-06	4e-06	k__Fungi;p__Ascomycota;c__Eurotiomycetes;o__Eurotiales;f__Trichocomaceae;g__Aspergillus;s__Aspergillus penicillioides
OTU_480	0	0	0	0	0	4e-06	No blast hit
OTU_481	0	0	4e-06	4e-06	0	0	k__Fungi;p__Ascomycota;c__Incertae_sedis_Ascomycota;o__Incertae_sedis_Ascomycota;f__Incertae_sedis_Ascomycota
OTU_482	0	1.1e-05	0	0	0	0	k__Fungi;p__Ascomycota
OTU_483	0	0	4e-06	0	1.1e-05	0	k__Fungi;p__Ascomycota;c__Eurotiomycetes;o__Eurotiales;f__Trichocomaceae;g__Penicillium;s__Penicillium simplicissimum
OTU_484	3.7e-05	7e-06	0	0	0	0	k__Fungi;p__Basidiomycota;c__Agaricomycetes;o__Russulales;f__Russulaceae
OTU_485	4e-06	0	0	7e-06	4.8e-05	3.4e-05	k__Fungi;p__Ascomycota;c__Eurotiomycetes;o__Eurotiales;f__Trichocomaceae;g__Penicillium
OTU_486	1.1e-05	7e-06	0	0	0	0	No blast hit
OTU_487	0	0	0	0	0	0	k__Fungi;p__Ascomycota;c__Dothideomycetes;o__Pleosporales;f__Montagnulaceae;g__Paraphaeosphaeria;s__Paraphaeosphaeria minitans
OTU_488	1.1e-05	0	0	0	0	0	No blast hit
OTU_489	4e-06	0	0	0	0	0	k__Fungi;p__Basidiomycota;c__Agaricomycetes;o__Russulales;f__Russulaceae;g__Russula;s__Russula punicea
OTU_490	0	0	0	0	4e-06	0	k__Fungi;p__Ascomycota;c__Sordariomycetes;o__Xylariales;f__Amphisphaeriaceae;g__Truncatella;s__Truncatella angustata
OTU_491	2.2e-05	0	0	0	0	0	k__Fungi;p__Ascomycota;c__Pezizomycetes;o__Pezizales;f__Helvellaceae
OTU_492	0	0	0	0	7e-06	0	No blast hit
OTU_493	0	4e-06	0	0	0	0	k__Fungi;p__Ascomycota;c__Dothideomycetes;o__Botryosphaeriales;f__Botryosphaeriaceae;g__Macrophomina;s__Macrophomina phaseolina
OTU_494	0	0	0	2.2e-05	0	0	k__Fungi;p__Ascomycota;c__Saccharomycetes;o__Saccharomycetales;f__Incertae_sedis_Saccharomycetales
OTU_495	2.2e-05	7e-06	0	7e-06	0	4e-06	k__Fungi;p__Ascomycota;c__Sordariomycetes;o__Hypocreales
OTU_496	0	0	0	0	1.9e-05	0	k__Fungi;p__Ascomycota;c__Eurotiomycetes;o__Eurotiales
OTU_497	4e-06	1.1e-05	0	0	0	0	k__Fungi;p__Ascomycota;c__Sordariomycetes;o__Sordariales;f__Lasiosphaeriaceae
OTU_498	1.1e-05	0	0	0	0	0	k__Fungi;p__Basidiomycota;c__Cystobasidiomycetes;o__Incertae_sedis_Cystobasidiomycetes;f__Incertae_sedis_Cystobasidiomycetes;g__Sakaguchia;s__Sakaguchia dacryoidea
OTU_499	0	4e-06	0	0	0	0	k__Fungi;p__Ascomycota;c__Dothideomycetes;o__Dothideales;f__Dothioraceae;g__Sydowia;s__Sydowia polyspora
OTU_500	1.5e-05	4e-06	0	0	0	0	k__Fungi;p__Basidiomycota;c__Agaricomycetes;o__Auriculariales;f__Incertae_sedis_Auriculariales
OTU_501	1.5e-05	0	0	0	0	0	k__Fungi;p__Ascomycota;c__Sordariomycetes;o__Hypocreales;f__Nectriaceae;g__Corallomycetella;s__Corallomycetella elegans
OTU_502	2.2e-05	0	1.1e-05	0	0	0	k__Fungi;p__Ascomycota;c__Eurotiomycetes;o__Eurotiales;f__Trichocomaceae;g__Aspergillus;s__Aspergillus penicillioides
OTU_503	7e-06	0	0	0	0	0	k__Fungi;p__Basidiomycota;c__Agaricomycetes;o__Polyporales;f__Meruliaceae;g__Bjerkandera;s__Bjerkandera adusta
OTU_504	1.1e-05	0	0	0	0	0	k__Fungi;p__Ascomycota;c__Sordariomycetes;o__Hypocreales;f__Nectriaceae;g__Neonectria;s__Neonectria fuckeliana
OTU_505	0	0	0	1.1e-05	0	7e-06	No blast hit
OTU_506	0	0	0	0	0	1.5e-05	k__Fungi;p__Basidiomycota;c__Agaricomycetes
OTU_507	0	0	0	2.6e-05	7e-06	0	k__Fungi;p__Basidiomycota;c__Tremellomycetes;o__Tremellales;f__Incertae_sedis_Tremellales
OTU_508	0	0	0	4e-06	0	0	k__Fungi;p__Ascomycota;c__Sordariomycetes;o__Xylariales;f__Xylariaceae
OTU_509	0	0	0	0	0	4e-06	k__Fungi;p__Ascomycota;c__Saccharomycetes;o__Saccharomycetales
OTU_510	0	0	4e-06	0	0	1.5e-05	k__Fungi;p__Ascomycota;c__Sordariomycetes;o__Hypocreales;f__Incertae_sedis_Hypocreales;g__Sarocladium;s__Sarocladium strictum
OTU_511	0	0	0	0	0	0	No blast hit
OTU_512	1.5e-05	4e-06	0	0	0	0	k__Fungi;p__Ascomycota;c__Sordariomycetes;o__Hypocreales;f__Nectriaceae;g__Fusicolla;s__Fusicolla merismoides
OTU_513	0	7e-06	0	0	0	0	No blast hit
OTU_514	0	0	0	0	0	0	No blast hit
OTU_515	2.2e-05	0	0	0	0	0	k__Fungi;p__Basidiomycota;c__Agaricomycetes;o__Agaricales;f__Schizophyllaceae;g__Schizophyllum;s__Schizophyllum commune
OTU_516	0	0	0	7e-06	0	0	No blast hit
OTU_517	0	4e-06	0	0	0	0	k__Fungi;p__Ascomycota;c__Sordariomycetes;o__Xylariales;f__Xylariaceae
OTU_518	5.2e-05	0	0	0	0	0	k__Fungi;p__Ascomycota;c__Eurotiomycetes;o__Onygenales;f__Onygenaceae;g__Chrysosporium;s__Chrysosporium pseudomerdarium
OTU_519	0	0	7e-06	0	0	0	No blast hit
OTU_520	0	0	0	0	1.1e-05	0	No blast hit
OTU_521	0	0	0	1.1e-05	7e-06	4e-06	No blast hit
OTU_522	1.1e-05	0	0	0	0	0	k__Fungi;p__Ascomycota;c__Incertae_sedis_Ascomycota;o__Incertae_sedis_Ascomycota;f__Incertae_sedis_Ascomycota
OTU_523	2.2e-05	0	0	0	0	0	No blast hit
OTU_524	0	0	0	0	0	4e-06	k__Fungi;p__Ascomycota;c__Sordariomycetes;o__Hypocreales;f__Nectriaceae;g__Nectria;s__Nectria dacryocarpa
OTU_525	3.4e-05	0	0	0	0	0	No blast hit
OTU_526	0	0	0	7e-06	0	0	k__Fungi;p__Basidiomycota;c__Agaricomycetes;o__Trechisporales;f__Hydnodontaceae;g__Luellia;s__Luellia cystidiata
OTU_527	7e-06	4e-06	0	1.5e-05	0	0	No blast hit
OTU_528	7e-06	0	0	0	0	0	k__Fungi;p__Ascomycota;c__Dothideomycetes;o__Mytilinidiales;f__Mytilinidiaceae;g__Taeniolella;s__Taeniolella phialosperma
OTU_529	1.1e-05	0	0	0	0	0	k__Fungi;p__Basidiomycota;c__Agaricomycetes;o__Agaricales;f__Mycenaceae;g__Mycena;s__Mycena epipterygia
OTU_530	0	7e-06	0	0	0	0	k__Fungi;p__Basidiomycota;c__Agaricomycetes;o__Agaricales;f__Inocybaceae
OTU_531	7e-06	0	0	0	0	0	k__Fungi;p__Ascomycota;c__Leotiomycetes
OTU_532	0	0	0	4e-06	0	0	k__Fungi;p__Ascomycota;c__Orbiliomycetes;o__Orbiliales;f__Orbiliaceae
OTU_533	1.5e-05	0	0	0	0	0	k__Fungi;p__Ascomycota
OTU_534	0	0	2.6e-05	0	0	0	No blast hit
OTU_535	0	4e-06	0	0	0	0	No blast hit
OTU_536	0	4e-06	0	0	0	0	k__Fungi;p__Ascomycota;c__Sordariomycetes;o__Hypocreales;f__Incertae_sedis_Hypocreales
OTU_537	0	0	0	0	7e-06	0	No blast hit
OTU_538	0	0	0	0	0	4e-06	k__Fungi;p__Basidiomycota;c__Agaricomycetes;o__Incertae_sedis_Agaricomycetes;f__Incertae_sedis_Agaricomycetes;g__Resinicium;s__Resinicium bicolor
OTU_539	1.5e-05	0	0	0	0	0	k__Fungi;p__Ascomycota;c__Leotiomycetes
OTU_540	0	0	0	0	0	7e-06	k__Fungi;p__Ascomycota;c__Incertae_sedis_Ascomycota;o__Incertae_sedis_Ascomycota;f__Incertae_sedis_Ascomycota
OTU_541	7e-06	0	0	0	0	0	No blast hit
OTU_542	0	0	0	0	0	0	k__Fungi;p__Ascomycota;c__Leotiomycetes;o__Helotiales;f__Rutstroemiaceae
OTU_543	0	0	4e-06	0	0	0	k__Fungi;p__Ascomycota;c__Sordariomycetes;o__Hypocreales;f__Nectriaceae;g__Penicillifer;s__Penicillifer diparietisporus
OTU_544	4e-06	4e-06	0	0	0	1.5e-05	k__Fungi;p__Ascomycota;c__Incertae_sedis_Ascomycota;o__Incertae_sedis_Ascomycota;f__Incertae_sedis_Ascomycota
OTU_545	0	4e-06	0	1.1e-05	0	0	k__Fungi;p__Ascomycota;c__Saccharomycetes;o__Saccharomycetales;f__Saccharomycopsidaceae;g__Saccharomycopsis;s__Saccharomycopsis crataegensis
OTU_546	0	7e-06	0	0	0	0	k__Fungi;p__Ascomycota;c__Leotiomycetes;o__Helotiales;f__Incertae_sedis_Helotiales
OTU_547	0	4e-06	0	0	0	0	k__Fungi;p__Ascomycota;c__Eurotiomycetes;o__Chaetothyriales;f__Herpotrichiellaceae
OTU_548	0	0	0	1.1e-05	0	4e-06	k__Fungi;p__Ascomycota;c__Incertae_sedis_Ascomycota;o__Incertae_sedis_Ascomycota;f__Incertae_sedis_Ascomycota
OTU_549	0	0	0	0	2.2e-05	0	k__Fungi;p__Ascomycota
OTU_550	2.2e-05	0	0	0	0	0	k__Fungi;p__Ascomycota;c__Sordariomycetes;o__Hypocreales;f__Nectriaceae
OTU_551	0	4e-06	0	0	0	0	k__Fungi;p__Ascomycota;c__Sordariomycetes;o__Chaetosphaeriales;f__Chaetosphaeriaceae
OTU_552	4e-06	0	0	4e-06	0	0	k__Fungi;p__Ascomycota;c__Incertae_sedis_Ascomycota;o__Incertae_sedis_Ascomycota;f__Incertae_sedis_Ascomycota
OTU_553	0	0	0	1.1e-05	0	0	k__Fungi;p__Ascomycota;c__Saccharomycetes;o__Saccharomycetales;f__Pichiaceae;g__Nakazawaea
OTU_554	7e-06	0	0	0	0	0	No blast hit
OTU_555	1.1e-05	0	0	0	0	0	k__Fungi;p__Ascomycota;c__Leotiomycetes
OTU_556	4e-06	4e-06	4e-06	7e-06	7e-06	0	k__Fungi;p__Ascomycota;c__Saccharomycetes;o__Saccharomycetales;f__Incertae_sedis_Saccharomycetales;g__Candida;s__Candida tropicalis
OTU_557	0	0	0	7e-06	0	0	k__Fungi;p__Ascomycota;c__Dothideomycetes;o__Myriangiales
OTU_558	0.007095	7e-06	0.000261	2.6e-05	3.7e-05	0.006416	k__Fungi;p__Ascomycota;c__Sordariomycetes;o__Hypocreales;f__Cordycipitaceae;g__Beauveria
OTU_559	1.9e-05	0	0	7e-06	0	0	k__Fungi;p__Ascomycota;c__Sordariomycetes;o__Sordariales;f__Lasiosphaeriaceae;g__Apodus;s__Apodus oryzae
OTU_560	0	0	0	0	0	0	k__Fungi;p__Ascomycota;c__Dothideomycetes;o__Capnodiales
OTU_561	0	4e-06	0	0	0	0	k__Fungi;p__Ascomycota;c__Sordariomycetes;o__Sordariales;f__Lasiosphaeriaceae
OTU_562	4e-06	1.1e-05	1.5e-05	1.9e-05	0	0	k__Fungi;p__Ascomycota;c__Sordariomycetes;o__Sordariales
OTU_563	0	0	0	0	0	0	k__Fungi;p__Basidiomycota;c__Microbotryomycetes;o__Sporidiobolales;f__Incertae_sedis_Sporidiobolales;g__Rhodotorula;s__Rhodotorula mucilaginosa
OTU_564	0	0	0	7e-06	0	0	No blast hit
OTU_565	0	4e-06	0	0	0	0	No blast hit
OTU_566	0	0	7e-06	0	0	0	No blast hit
OTU_567	0	0	0	0	7e-06	0	No blast hit
OTU_568	0	4e-06	0	0	0	0	k__Fungi;p__Ascomycota;c__Sordariomycetes
OTU_569	0	0	0	0	0	0	k__Fungi;p__Ascomycota;c__Saccharomycetes;o__Saccharomycetales;f__Pichiaceae;g__Pichia;s__Pichia fermentans
OTU_570	0	7e-06	0	0	4e-06	0	k__Fungi;p__Ascomycota;c__Dothideomycetes
OTU_571	0	0	0	0	0	0	k__Fungi;p__Ascomycota;c__Leotiomycetes
OTU_572	1.1e-05	0	0	0	0	0	No blast hit
OTU_573	1.5e-05	0	0	0	0	0	k__Fungi;p__Ascomycota
OTU_574	0.000276	1.1e-05	6e-05	0.004738	3.4e-05	0.000168	k__Fungi;p__Ascomycota;c__Saccharomycetes;o__Saccharomycetales;f__Pichiaceae
OTU_575	0	1.5e-05	0	0	0	0	k__Fungi;p__Ascomycota;c__Pezizomycetes;o__Pezizales;f__Sarcosomataceae;g__Pseudoplectania;s__Pseudoplectania episphagnum
OTU_576	0	0	0	4e-06	0	0	k__Fungi;p__Ascomycota;c__Sordariomycetes;o__Hypocreales;f__Nectriaceae;g__Gliocladiopsis
OTU_577	0	0	0	0	0	0	k__Fungi;p__Ascomycota;c__Dothideomycetes;o__Pleosporales;f__Leptosphaeriaceae
OTU_578	7e-06	0	0	0	0	0	k__Fungi;p__Basidiomycota;c__Agaricomycetes;o__Agaricales
OTU_579	0	4e-06	0	0	0	0	k__Fungi;p__Ascomycota;c__Saccharomycetes;o__Saccharomycetales;f__Incertae_sedis_Saccharomycetales;g__Candida;s__Candida nitratophila
OTU_580	0	0	4e-06	7e-06	0	0	No blast hit
OTU_581	1.9e-05	0	0	0	0	0	k__Fungi;p__Basidiomycota;c__Agaricomycetes;o__Agaricales;f__Physalacriaceae
OTU_582	0.001089	0	0	0	0	0	No blast hit
OTU_583	0	7e-06	0	0	0	0	k__Fungi;p__Ascomycota;c__Sordariomycetes;o__Sordariales;f__Chaetomiaceae;g__Chaetomium
OTU_584	4e-06	0	0	0	0	0	k__Fungi;p__Ascomycota;c__Dothideomycetes
OTU_585	1.5e-05	0	0	0	0	0	No blast hit
OTU_586	0	4e-06	0	1.5e-05	0	0	k__Fungi;p__Basidiomycota;c__Agaricomycetes;o__Russulales
OTU_587	7e-06	0	0	0	0	0	No blast hit
OTU_588	4e-06	0	0	0	0	0	k__Fungi;p__Ascomycota;c__Sordariomycetes
OTU_589	0	0	7e-06	0	0	0	No blast hit
OTU_590	0	0	1.5e-05	0	0	0	No blast hit
OTU_591	0	0	0	1.1e-05	0	0	k__Fungi;p__Basidiomycota;c__Agaricomycetes
OTU_592	4e-06	0	0	0	0	0	k__Fungi;p__Ascomycota
OTU_593	7e-06	0	0	0	0	0	No blast hit
OTU_594	0	4e-06	0	0	0	0	k__Fungi;p__Ascomycota;c__Leotiomycetes;o__Helotiales;f__Incertae_sedis_Helotiales
OTU_595	0	0	0	0	0	7e-06	No blast hit
OTU_596	0	0	0	1.9e-05	0	0	k__Fungi;p__Basidiomycota;c__Wallemiomycetes;o__Geminibasidiales;f__Geminibasidiaceae
OTU_597	0	1.5e-05	0	0	0	0	No blast hit
OTU_598	7e-06	0	0	0	0	0	k__Fungi;p__Ascomycota;c__Dothideomycetes;o__Pleosporales;f__Pleosporaceae;g__Curvularia;s__Curvularia lunata
OTU_599	0	0	0	0	0	0	k__Fungi;p__Ascomycota;c__Eurotiomycetes;o__Eurotiales;f__Trichocomaceae
OTU_600	7e-06	0	0	0	0	7e-06	k__Fungi;p__Ascomycota;c__Eurotiomycetes;o__Eurotiales;f__Trichocomaceae;g__Aspergillus
OTU_601	0.000317	4e-06	0	0	4e-06	0	k__Fungi;p__Ascomycota;c__Eurotiomycetes;o__Eurotiales;f__Trichocomaceae;g__Aspergillus;s__Aspergillus restrictus
OTU_602	0	7e-06	0	0	0	0	k__Fungi;p__Ascomycota;c__Saccharomycetes;o__Saccharomycetales;f__Incertae_sedis_Saccharomycetales;g__Cyberlindnera;s__Cyberlindnera veronae
OTU_603	0	4e-06	0	0	0	0	k__Fungi;p__Ascomycota;c__Leotiomycetes;o__Helotiales;f__Incertae_sedis_Helotiales
OTU_604	0	0	0	0	4e-06	0	No blast hit
OTU_605	0.000108	0	4e-06	0	0	1.1e-05	k__Fungi;p__Ascomycota;c__Eurotiomycetes;o__Eurotiales;f__Trichocomaceae;g__Penicillium;s__Penicillium salmoniflumine
OTU_606	4e-06	0	0	0	0	0	k__Fungi;p__Basidiomycota;c__Agaricomycetes;o__Thelephorales
OTU_607	0	0	7e-06	0	0	0	k__Fungi;p__Ascomycota;c__Sordariomycetes;o__Hypocreales;f__Incertae_sedis_Hypocreales;g__Geosmithia;s__Geosmithia flava
OTU_608	1.1e-05	0	7e-06	0	4e-06	4e-06	k__Fungi;p__Ascomycota
OTU_609	7e-06	0	4e-06	1.1e-05	0	0	k__Fungi;p__Ascomycota;c__Eurotiomycetes
OTU_610	0	0	1.1e-05	0	0	0	k__Fungi;p__Ascomycota;c__Leotiomycetes;o__Helotiales;f__Dermateaceae
OTU_611	0	0	4e-06	4e-06	0	0	k__Fungi;p__Ascomycota;c__Leotiomycetes;o__Rhytismatales
OTU_612	7e-06	0	0	0	0	0	k__Fungi;p__Basidiomycota;c__Exobasidiomycetes;o__Exobasidiales;f__Exobasidiaceae;g__Exobasidium;s__Exobasidium canadense
OTU_613	1.1e-05	0	0	0	0	0	No blast hit
OTU_614	0	0	0	4e-06	0	1.1e-05	k__Fungi;p__Basidiomycota;c__Tremellomycetes;o__Tremellales;f__Incertae_sedis_Tremellales;g__Fellomyces;s__Fellomyces thailandicus
OTU_615	0	0	0	0	0	0	k__Fungi;p__Ascomycota;c__Dothideomycetes;o__Pleosporales;f__Incertae_sedis_Pleosporales
OTU_616	1.5e-05	0	0	4e-06	0	0	k__Fungi;p__Ascomycota;c__Sordariomycetes;o__Hypocreales;f__Bionectriaceae
OTU_617	7e-06	0	0	0	0	0	k__Fungi;p__Ascomycota;c__Dothideomycetes;o__Pleosporales;f__Massarinaceae
OTU_618	0	0	4e-06	4e-06	0	0	k__Fungi;p__Ascomycota
OTU_619	0	0	0	7e-06	0	0	k__Fungi;p__Ascomycota;c__Eurotiomycetes;o__Eurotiales;f__Trichocomaceae;g__Aspergillus;s__Aspergillus cervinus
OTU_620	0	4e-06	0	0	0	0	k__Fungi;p__Ascomycota;c__Sordariomycetes;o__Sordariales;f__Lasiosphaeriaceae;g__Podospora;s__Podospora appendiculata
OTU_621	0	0	0	4e-06	7e-06	0	k__Fungi;p__Ascomycota
OTU_622	0	0	2.2e-05	0	0	0	k__Fungi;p__Ascomycota
OTU_623	0	4e-06	0	0	0	0	k__Fungi;p__Ascomycota
OTU_624	0	0	0	0	1.1e-05	0	k__Fungi;p__Ascomycota;c__Sordariomycetes;o__Sordariales;f__Chaetomiaceae
OTU_625	4e-06	4e-06	0	0	0	0	k__Fungi;p__Zygomycota;c__Incertae_sedis_Zygomycota;o__Mortierellales
OTU_626	0	0	0	1.5e-05	0	0	k__Fungi;p__Basidiomycota;c__Agaricomycetes;o__Agaricales;f__Marasmiaceae;g__Marasmius;s__Marasmius siccus
OTU_627	0	0	0	0	1.5e-05	0	No blast hit
OTU_628	0	1.1e-05	0	0	0	0	No blast hit
OTU_629	7e-06	0	0	0	0	0	k__Fungi;p__Ascomycota;c__Sordariomycetes;o__Incertae_sedis_Sordariomycetes
OTU_630	4e-06	0	0	0	0	0	k__Fungi;p__Basidiomycota;c__Agaricomycetes;o__Polyporales;f__Meripilaceae;g__Grifola;s__Grifola frondosa
OTU_631	7e-06	0	0	0	0	0	k__Fungi;p__Ascomycota;c__Dothideomycetes
OTU_632	0	7e-06	0	0	0	0	No blast hit
OTU_633	0	0	0	0	0	0	k__Fungi;p__Zygomycota;c__Incertae_sedis_Zygomycota;o__Mortierellales;f__Mortierellaceae;g__Mortierella;s__Mortierella zonata
OTU_634	0	0	0	0	0	0	k__Fungi;p__Basidiomycota;c__Agaricomycetes
OTU_635	0	0	0	4e-06	0	0	k__Fungi;p__Basidiomycota;c__Agaricostilbomycetes;o__Agaricostilbales;f__Agaricostilbaceae
OTU_636	0	4e-06	0	0	0	0	No blast hit
OTU_637	0	0	0	0	4e-06	4e-06	k__Fungi;p__Basidiomycota;c__Agaricomycetes;o__Agaricales;f__Mycenaceae;g__Mycena;s__Mycena galopus
OTU_638	1.1e-05	0	0	0	0	0	No blast hit
OTU_639	1.5e-05	0	0	0	0	0	No blast hit
OTU_640	0	0	0	0	1.5e-05	0	No blast hit
OTU_641	7e-06	7e-06	0	0	0	0	k__Fungi;p__Ascomycota;c__Leotiomycetes;o__Incertae_sedis_Leotiomycetes;f__Myxotrichaceae;g__Pseudogymnoascus;s__Pseudogymnoascus alpinus
OTU_642	0	1.1e-05	0	0	0	0	k__Fungi;p__Ascomycota;c__Sordariomycetes;o__Incertae_sedis_Sordariomycetes;f__Plectosphaerellaceae
OTU_643	0	7e-06	0	0	0	0	k__Fungi;p__Ascomycota;c__Sordariomycetes;o__Ophiostomatales;f__Ophiostomataceae;g__Ophiostoma;s__Ophiostoma fasciatum
OTU_644	0	0	0	0	4e-06	0	k__Fungi;p__Basidiomycota;c__Tremellomycetes
OTU_645	0	0	4e-06	0	0	0	k__Fungi;p__Ascomycota;c__Sordariomycetes;o__Hypocreales;f__Clavicipitaceae
OTU_646	0	0	0	0	4e-06	4e-06	k__Fungi;p__Ascomycota;c__Sordariomycetes;o__Hypocreales;f__Clavicipitaceae
OTU_647	1.5e-05	0	0	0	0	0	k__Fungi;p__Basidiomycota;c__Wallemiomycetes;o__Wallemiales;f__Wallemiaceae;g__Wallemia;s__Wallemia sebi
OTU_648	0	1.5e-05	0	0	0	0	k__Fungi;p__Basidiomycota;c__Microbotryomycetes;o__Sporidiobolales;f__Incertae_sedis_Sporidiobolales
OTU_649	0	0	0	0	0	4e-06	k__Fungi;p__Ascomycota;c__Dothideomycetes;o__Pleosporales;f__Leptosphaeriaceae
OTU_650	1.1e-05	0	0	0	0	4e-06	No blast hit
OTU_651	0	4e-06	0	0	0	0	k__Fungi;p__Ascomycota;c__Eurotiomycetes
OTU_652	0	0	0	0	1.1e-05	0	k__Fungi;p__Ascomycota;c__Dothideomycetes;o__Venturiales
OTU_653	7e-06	0	0	0	1.1e-05	0	k__Fungi;p__Ascomycota
OTU_654	0	0	0	0	4e-06	0	k__Fungi;p__Ascomycota;c__Archaeorhizomycetes;o__Archaeorhizomycetales;f__Archaeorhizomycetaceae
OTU_655	0	4e-06	0	0	0	0	k__Fungi;p__Ascomycota;c__Eurotiomycetes;o__Chaetothyriales
OTU_656	7e-06	0	0	0	0	0	k__Fungi;p__Ascomycota;c__Sordariomycetes;o__Hypocreales;f__Incertae_sedis_Hypocreales;g__Trichothecium;s__Trichothecium crotocinigenum
OTU_657	2.6e-05	0	0	0	0	0	k__Fungi;p__Ascomycota;c__Eurotiomycetes;o__Eurotiales;f__Trichocomaceae;g__Penicillium;s__Penicillium parvulum
OTU_658	7e-06	0	0	0	0	0	k__Fungi;p__Basidiomycota;c__Tremellomycetes;o__Cystofilobasidiales;f__Cystofilobasidiaceae;g__Itersonilia;s__Itersonilia perplexans
OTU_659	0	0	0	0	0	0	k__Fungi;p__Ascomycota;c__Leotiomycetes;o__Incertae_sedis_Leotiomycetes;f__Myxotrichaceae
OTU_660	0	5.6e-05	0	0	0	0	k__Fungi;p__Ascomycota;c__Saccharomycetes;o__Saccharomycetales
OTU_661	0	0	0	0	1.5e-05	0	No blast hit
OTU_662	0	0	4e-06	4e-06	0	0	k__Fungi;p__Basidiomycota;c__Agaricomycetes;o__Agaricales;f__Hygrophoraceae;g__Gliophorus;s__Gliophorus laetus
OTU_663	4e-06	0	0	0	0	0	k__Fungi;p__Ascomycota;c__Leotiomycetes;o__Helotiales;f__Incertae_sedis_Helotiales
OTU_664	0	4e-06	0	0	0	0	No blast hit
OTU_665	0	0	0	0	1.5e-05	0	k__Fungi;p__Basidiomycota;c__Tremellomycetes;o__Tremellales;f__Incertae_sedis_Tremellales;g__Cryptococcus
OTU_666	0	4e-06	0	0	0	0	k__Fungi;p__Ascomycota;c__Dothideomycetes
OTU_667	3.7e-05	0	0	0	0	0	No blast hit
OTU_668	0	4e-06	0	0	0	0	k__Fungi;p__Ascomycota;c__Leotiomycetes
OTU_669	1.1e-05	0	0	0	0	0	k__Fungi;p__Ascomycota;c__Leotiomycetes;o__Helotiales;f__Incertae_sedis_Helotiales
OTU_670	7e-06	0	0	0	0	0	k__Fungi;p__Ascomycota;c__Sordariomycetes;o__Xylariales
OTU_671	0	0	4e-06	0	0	0	k__Fungi;p__Ascomycota
OTU_672	0	0	0	1.1e-05	0	4e-06	k__Fungi;p__Basidiomycota;c__Agaricomycetes;o__Russulales;f__Russulaceae;g__Russula;s__Russula ochroleuca
OTU_673	0	0	0	0	7e-06	0	k__Fungi;p__Ascomycota;c__Leotiomycetes
OTU_674	0	0	0	0	0	0	k__Fungi;p__Basidiomycota;c__Agaricomycetes;o__Thelephorales;f__Thelephoraceae
OTU_675	0	0	0	4e-06	0	0	k__Fungi;p__Ascomycota;c__Leotiomycetes;o__Incertae_sedis_Leotiomycetes;f__Myxotrichaceae;g__Myxotrichum;s__Myxotrichum setosum
OTU_676	4e-06	0	4e-06	0	0	0	No blast hit
OTU_677	0	0	0	0	0	0	k__Fungi;p__Ascomycota;c__Incertae_sedis_Ascomycota;o__Incertae_sedis_Ascomycota;f__Incertae_sedis_Ascomycota
OTU_678	0.000108	0	4e-06	0	1.1e-05	1.1e-05	k__Fungi;p__Ascomycota;c__Sordariomycetes;o__Microascales;f__Ceratocystidaceae
OTU_679	0	0	0	1.1e-05	0	0	k__Fungi;p__Ascomycota
OTU_680	7e-06	0	0	0	0	0	No blast hit
OTU_681	0	0	0	0	0	1.9e-05	No blast hit
OTU_682	0	4e-06	0	0	0	0	k__Fungi;p__Basidiomycota;c__Tremellomycetes;o__Trichosporonales;f__Trichosporonaceae;g__Trichosporon;s__Trichosporon cutaneum
OTU_683	0	0	0.000369	0	0	7e-06	No blast hit
OTU_684	0	0	0.001813	7e-06	0	0.000101	k__Fungi;p__Ascomycota;c__Sordariomycetes;o__Hypocreales;f__Cordycipitaceae;g__Lecanicillium;s__Lecanicillium psalliotae
OTU_685	0	0	0	0	4e-06	4e-06	k__Fungi;p__Basidiomycota;c__Agaricomycetes;o__Agaricales;f__Strophariaceae;g__Galerina;s__Galerina allospora
OTU_686	0	0	0	6e-05	1.5e-05	0	No blast hit
OTU_687	0	0	0	0	0	0	k__Fungi;p__Ascomycota;c__Leotiomycetes;o__Helotiales;f__Vibrisseaceae
OTU_688	0	0	4e-06	4e-06	0	0	k__Fungi;p__Ascomycota
OTU_689	0	0	0	4e-06	0	0	k__Fungi;p__Ascomycota;c__Eurotiomycetes;o__Chaetothyriales;f__Herpotrichiellaceae
OTU_690	0	0	0.000172	0	0	0.000201	k__Fungi;p__Ascomycota;c__Saccharomycetes;o__Saccharomycetales;f__Incertae_sedis_Saccharomycetales
OTU_691	1.1e-05	0	0	0	0	0	k__Fungi;p__Ascomycota;c__Incertae_sedis_Ascomycota;o__Incertae_sedis_Ascomycota;f__Incertae_sedis_Ascomycota
OTU_692	0	0	0	0	0	4e-06	No blast hit
OTU_693	0	0	0	0	7e-06	0	No blast hit
OTU_694	0	0	0	0	0	0	k__Fungi;p__Ascomycota;c__Sordariomycetes;o__Hypocreales;f__Hypocreaceae
OTU_695	1.1e-05	0	0	0	0	0	k__Fungi;p__Ascomycota
OTU_696	4e-06	0	0	0	0	0	k__Fungi;p__Ascomycota;c__Leotiomycetes;o__Erysiphales;f__Erysiphaceae;g__Phyllactinia;s__Phyllactinia populi
OTU_697	1.9e-05	0	0	0	0	0	k__Fungi;p__Ascomycota;c__Sordariomycetes;o__Magnaporthales;f__Magnaporthaceae;g__Gaeumannomyces;s__Gaeumannomyces graminis
OTU_698	0	0	0	0	0	0	No blast hit
OTU_699	0	0	4e-06	0	0	0	k__Fungi;p__Basidiomycota
OTU_700	1.1e-05	0	0	0	0	0	No blast hit
OTU_701	7e-06	0	0	0	3e-05	4.1e-05	k__Fungi;p__Ascomycota;c__Leotiomycetes;o__Incertae_sedis_Leotiomycetes;f__Myxotrichaceae;g__Oidiodendron;s__Oidiodendron tenuissimum
OTU_702	0	4e-06	0	0	0	0	k__Fungi;p__Ascomycota;c__Leotiomycetes;o__Helotiales;f__Dermateaceae
OTU_703	0	0.002563	0	0	0	0	k__Fungi;p__Basidiomycota;c__Microbotryomycetes;o__Sporidiobolales;f__Incertae_sedis_Sporidiobolales;g__Rhodotorula;s__Rhodotorula hylophila
OTU_704	0	0	0	0	0	0	k__Fungi;p__Ascomycota;c__Sordariomycetes
OTU_705	0	0	4e-06	4e-06	7e-06	1.1e-05	No blast hit
OTU_706	0	1.5e-05	0	0	0	0	k__Fungi;p__Ascomycota;c__Sordariomycetes;o__Microascales;f__Ceratocystidaceae
OTU_707	0	0	0	0	0	7e-06	k__Fungi;p__Ascomycota;c__Dothideomycetes;o__Myriangiales
OTU_708	0	0	0	0	0	0	No blast hit
OTU_709	0	7e-06	0	0	0	0	k__Fungi;p__Ascomycota;c__Sordariomycetes;o__Microascales;f__Microascaceae
OTU_710	0	0	0	0	0	0	k__Fungi;p__Basidiomycota;c__Agaricomycetes;o__Agaricales;f__Clavariaceae;g__Clavulinopsis;s__Clavulinopsis laeticolor
OTU_711	4e-06	0	0	0	0	0	k__Fungi;p__Basidiomycota;c__Agaricomycetes;o__Sebacinales
OTU_712	0	0	0	4e-06	0	0	k__Fungi;p__Ascomycota;c__Eurotiomycetes;o__Eurotiales;f__Trichocomaceae;g__Penicillium
OTU_713	0	0	0	0	0	0	No blast hit
OTU_714	0	0	7e-06	4e-06	0	0	No blast hit
OTU_715	3e-05	0	0	0	0	0	k__Fungi;p__Ascomycota;c__Leotiomycetes;o__Rhytismatales
OTU_716	0	0	0	0	0	0	k__Fungi;p__Ascomycota;c__Lecanoromycetes;o__Peltigerales;f__Pannariaceae;g__Pannaria;s__Pannaria conoplea
OTU_717	0	1.5e-05	0	0	0	0	k__Fungi;p__Ascomycota;c__Sordariomycetes;o__Sordariales;f__Lasiosphaeriaceae;g__Schizothecium;s__Schizothecium fimbriatum
OTU_718	0.000149	0	0	0	0	0	k__Fungi;p__Ascomycota;c__Eurotiomycetes;o__Eurotiales;f__Trichocomaceae;g__Talaromyces;s__Talaromyces rugulosus
OTU_719	4e-06	0	0	0	0	0	No blast hit
OTU_720	0	0	0	0	0	0	k__Fungi;p__Ascomycota;c__Sordariomycetes
OTU_721	0	0	7e-06	0	0	0	k__Fungi;p__Basidiomycota;c__Agaricomycetes
OTU_722	4e-06	0	0	7e-06	0	0	k__Fungi;p__Ascomycota;c__Sordariomycetes;o__Hypocreales;f__Ophiocordycipitaceae
OTU_723	0	4e-06	0	0	0	0	No blast hit
OTU_724	4e-06	0.000351	0	0	0	0	k__Fungi;p__Ascomycota;c__Sordariomycetes;o__Incertae_sedis_Sordariomycetes;f__Plectosphaerellaceae
OTU_725	0	0	4e-06	0	0	0	No blast hit
OTU_726	4e-06	0	0	0	0	0	k__Fungi;p__Ascomycota;c__Sordariomycetes
OTU_727	0	0	0	0	0	0	No blast hit
OTU_728	4e-06	0	0	0	0	0	k__Fungi;p__Basidiomycota;c__Agaricomycetes;o__Agaricales;f__Bolbitiaceae;g__Conocybe;s__Conocybe deliquescens
OTU_729	1.1e-05	0	0	0	0	0	k__Fungi;p__Basidiomycota;c__Agaricomycetes;o__Thelephorales;f__Thelephoraceae
OTU_730	7e-06	0	0	0	0	0	No blast hit
OTU_731	0	0	0	0	0	0	No blast hit
OTU_732	0	0	4e-06	0	0	0	k__Fungi;p__Ascomycota;c__Dothideomycetes;o__Pleosporales;f__Incertae_sedis_Pleosporales
OTU_733	4.5e-05	1.5e-05	6.3e-05	8.2e-05	0	0.000153	k__Fungi;p__Ascomycota;c__Leotiomycetes;o__Incertae_sedis_Leotiomycetes
OTU_734	0	0	0	0	0	0	k__Fungi;p__Basidiomycota;c__Wallemiomycetes;o__Wallemiales;f__Wallemiaceae
OTU_735	4e-06	0	0	0	0	0	k__Fungi;p__Ascomycota;c__Pezizomycetes;o__Pezizales;f__Discinaceae;g__Hydnotrya;s__Hydnotrya laojunshanensis
OTU_736	0	4e-06	0	0	0	0	k__Fungi;p__Ascomycota;c__Eurotiomycetes;o__Chaetothyriales
OTU_737	9e-05	0.000254	0	0	0	4e-06	k__Fungi;p__Ascomycota;c__Sordariomycetes;o__Ophiostomatales;f__Ophiostomataceae
OTU_738	1.5e-05	0	0	0	0	0	k__Fungi;p__Ascomycota;c__Dothideomycetes
OTU_739	4e-06	7e-06	0	0	0	0	k__Fungi;p__Basidiomycota;c__Agaricomycetes;o__Cantharellales;f__Ceratobasidiaceae;g__Thanatephorus;s__Thanatephorus cucumeris
OTU_740	0	7e-06	0	0	0	0	No blast hit
OTU_741	0	0	0	4e-06	0	0	No blast hit
OTU_742	4e-06	0.000164	0	0	0	0	k__Fungi;p__Ascomycota;c__Sordariomycetes;o__Hypocreales
OTU_743	0	0	0	0	0	0	No blast hit
OTU_744	0	0	4e-06	4e-06	0	0	k__Fungi;p__Basidiomycota;c__Agaricomycetes
OTU_745	0	0	0	0	0	0	k__Fungi;p__Ascomycota;c__Saccharomycetes;o__Saccharomycetales;f__Pichiaceae;g__Yamadazyma;s__Yamadazyma scolyti
OTU_746	2.2e-05	0	0	0	0	0	No blast hit
OTU_747	0	0	7e-06	4e-06	0	0	k__Fungi;p__Ascomycota;c__Orbiliomycetes;o__Orbiliales;f__Orbiliaceae;g__Arthrobotrys;s__Arthrobotrys amerospora
OTU_748	0	0	0	0	0	0	No blast hit
OTU_749	0	4e-06	0	0	0	0	k__Fungi;p__Ascomycota;c__Leotiomycetes;o__Helotiales
OTU_750	0	0	0	0	0	0	k__Fungi;p__Ascomycota;c__Sordariomycetes;o__Sordariales;f__Chaetomiaceae
OTU_751	7e-06	0	4e-06	0	4e-06	0	k__Fungi;p__Basidiomycota;c__Tremellomycetes;o__Tremellales;f__Incertae_sedis_Tremellales;g__Cryptococcus;s__Cryptococcus wieringae
OTU_752	0	7e-06	0	0	0	7e-06	k__Fungi;p__Ascomycota;c__Orbiliomycetes;o__Orbiliales;f__Orbiliaceae;g__Orbilia;s__Orbilia auricolor
OTU_753	0	0	0	0	0	0	k__Fungi;p__Ascomycota;c__Pezizomycetes
OTU_754	0	0	0	7e-06	0	0	No blast hit
OTU_755	0	0	0	0	0	4e-06	No blast hit
OTU_756	0	0	0	0	1.1e-05	4e-06	k__Fungi;p__Zygomycota;c__Incertae_sedis_Zygomycota;o__Mucorales;f__Cunninghamellaceae;g__Absidia;s__Absidia glauca
OTU_757	0	4e-06	0	0	0	0	k__Fungi;p__Ascomycota;c__Sordariomycetes
OTU_758	0	0	4e-06	0	0	0	k__Fungi;p__Ascomycota;c__Eurotiomycetes;o__Eurotiales;f__Trichocomaceae;g__Talaromyces;s__Talaromyces minioluteus
OTU_759	7e-06	0	0	0	0	0	k__Fungi;p__Basidiomycota;c__Agaricomycetes;o__Boletales;f__Coniophoraceae;g__Coniophora;s__Coniophora puteana
OTU_760	0	0	0	0	0	0	k__Fungi;p__Basidiomycota;c__Agaricomycetes;o__Sebacinales;f__Sebacinaceae
OTU_761	0	4e-06	0	0	0	0	k__Fungi;p__Ascomycota;c__Sordariomycetes
OTU_762	0	4e-06	0	0	0	0	k__Fungi;p__Ascomycota;c__Dothideomycetes;o__Botryosphaeriales;f__Botryosphaeriaceae
OTU_763	1.5e-05	0	0	0.000131	1.5e-05	4.8e-05	k__Fungi;p__Ascomycota;c__Eurotiomycetes;o__Eurotiales;f__Trichocomaceae;g__Penicillium;s__Penicillium roqueforti
OTU_764	7e-06	0	0	0	0	0	k__Fungi;p__Ascomycota;c__Sordariomycetes;o__Sordariales;f__Lasiosphaeriaceae
OTU_765	0	0	0	0	0	0	k__Fungi;p__Ascomycota;c__Saccharomycetes;o__Saccharomycetales;f__Incertae_sedis_Saccharomycetales;g__Cyberlindnera
OTU_766	7e-06	0	0	0	0	0	No blast hit
OTU_767	4e-06	0	0	0	0	0	No blast hit
OTU_768	0	0	0	0	1.9e-05	0	k__Fungi;p__Zygomycota;c__Incertae_sedis_Zygomycota
OTU_769	7e-06	0	0	0	0	0	k__Fungi;p__Ascomycota;c__Sordariomycetes;o__Microascales;f__Microascaceae;g__Microascus;s__Microascus pyramidus
OTU_770	7e-06	0	0	1.1e-05	3e-05	0	k__Fungi;p__Ascomycota;c__Saccharomycetes;o__Saccharomycetales;f__Pichiaceae;g__Yamadazyma;s__Yamadazyma scolyti
OTU_771	0	0	0	0	0	0	k__Fungi;p__Ascomycota;c__Sordariomycetes;o__Hypocreales;f__Clavicipitaceae
OTU_772	7e-06	0	0	0	0	0	No blast hit
OTU_773	1.5e-05	0	0	0	0	0	No blast hit
OTU_774	0	0	8.6e-05	4.8e-05	0.001235	0.003596	k__Fungi;p__Ascomycota;c__Saccharomycetes;o__Saccharomycetales;f__Incertae_sedis_Saccharomycetales;g__Cyberlindnera;s__Cyberlindnera amylophila
OTU_775	1.1e-05	0	0	0	0	0	k__Fungi;p__Ascomycota;c__Sordariomycetes;o__Hypocreales;f__Cordycipitaceae;g__Cordyceps;s__Cordyceps militaris
OTU_776	0	0	0	4e-06	0	0	k__Fungi;p__Ascomycota;c__Dothideomycetes;o__Pleosporales
OTU_777	0	0	4e-06	7e-06	0	0	k__Fungi;p__Ascomycota;c__Sordariomycetes;o__Hypocreales;f__Bionectriaceae
OTU_778	7e-06	0	0	0	0	0	No blast hit
OTU_779	0	0	0	7e-06	0	0	k__Fungi;p__Ascomycota;c__Leotiomycetes
OTU_780	0	0	0	0	0	0	No blast hit
OTU_781	0	0	0	0	0	0	k__Fungi;p__Basidiomycota;c__Agaricomycetes;o__Agaricales;f__Mycenaceae;g__Panellus;s__Panellus stipticus
OTU_782	7e-06	0	0	0	0	0	k__Fungi;p__Ascomycota;c__Pezizomycetes;o__Pezizales;f__Pyronemataceae
OTU_783	4e-06	0	0	0	0	4e-06	k__Fungi;p__Ascomycota;c__Sordariomycetes;o__Incertae_sedis_Sordariomycetes;f__Incertae_sedis_Sordariomycetes;g__Eucasphaeria;s__Eucasphaeria capensis
OTU_784	0	7e-06	0	0	0	0	k__Fungi;p__Ascomycota;c__Lecanoromycetes;o__Ostropales;f__Stictidaceae
OTU_785	1.5e-05	0	0	0	0	0	k__Fungi;p__Ascomycota;c__Dothideomycetes
OTU_786	0	0	0	0	0	0	k__Fungi;p__Ascomycota;c__Sordariomycetes;o__Incertae_sedis_Sordariomycetes;f__Annulatascaceae
OTU_787	0	0	0	0	0	0	k__Fungi;p__Ascomycota;c__Leotiomycetes;o__Helotiales;f__Sclerotiniaceae;g__Ciborinia;s__Ciborinia allii
OTU_788	0	4e-06	0	0	0	0	k__Fungi;p__Ascomycota;c__Sordariomycetes
OTU_789	0	0	0	4e-06	0	0	k__Fungi;p__Basidiomycota
OTU_790	1.5e-05	4e-06	0	0	0	0	k__Fungi;p__Ascomycota;c__Leotiomycetes;o__Helotiales;f__Vibrisseaceae;g__Phialocephala;s__Phialocephala lagerbergii
OTU_791	7e-06	0	0	0	0	0	No blast hit
OTU_792	0	0	0	0	0	0	k__Fungi;p__Basidiomycota;c__Agaricomycetes;o__Thelephorales;f__Thelephoraceae
OTU_793	0	0	0	4e-06	0	0	No blast hit
OTU_794	0	0	0	0	0	0	k__Fungi;p__Ascomycota;c__Saccharomycetes;o__Saccharomycetales;f__Trichomonascaceae
OTU_795	0	0	1.1e-05	4e-06	0	0	k__Fungi;p__Zygomycota;c__Incertae_sedis_Zygomycota;o__Mortierellales;f__Mortierellaceae;g__Mortierella;s__Mortierella chlamydospora
OTU_796	0	0	0	0	0	0	k__Fungi;p__Ascomycota;c__Incertae_sedis_Ascomycota;o__Incertae_sedis_Ascomycota;f__Pseudeurotiaceae
OTU_797	0	0	0	0	0	0	k__Fungi;p__Ascomycota
OTU_798	7e-06	0	0	0	0	0	k__Fungi;p__Ascomycota;c__Sordariomycetes;o__Incertae_sedis_Sordariomycetes;f__Glomerellaceae;g__Colletotrichum;s__Colletotrichum gloeosporioides
OTU_799	0	0	0	0	0	0	k__Fungi;p__Ascomycota;c__Leotiomycetes;o__Incertae_sedis_Leotiomycetes;f__Incertae_sedis_Leotiomycetes
OTU_800	0	0	0	0	0	0	k__Fungi;p__Ascomycota;c__Dothideomycetes;o__Capnodiales;f__Capnodiaceae
OTU_801	0	0	7e-06	0	0	0	No blast hit
OTU_802	0	0	4e-06	0	0	0	No blast hit
OTU_803	0	7e-06	0	0	4e-06	0	k__Fungi;p__Basidiomycota;c__Agaricomycetes;o__Agaricales;f__Hydnangiaceae;g__Laccaria
OTU_804	0	1.1e-05	0	0	0	0	No blast hit
OTU_805	7e-06	0	0	0	0	0	k__Fungi;p__Ascomycota;c__Leotiomycetes;o__Erysiphales;f__Erysiphaceae;g__Podosphaera
OTU_806	4e-06	0	0	0	0	0	k__Fungi;p__Ascomycota;c__Eurotiomycetes;o__Chaetothyriales
OTU_807	0	0	0	0	0	1.5e-05	k__Fungi;p__Ascomycota;c__Eurotiomycetes;o__Eurotiales
OTU_808	0	0	0	0	0	0	No blast hit
OTU_809	4e-06	0	0	0	0	0	k__Fungi;p__Ascomycota;c__Eurotiomycetes;o__Chaetothyriales;f__Herpotrichiellaceae
OTU_810	0	0	0	0	7e-06	0	No blast hit
OTU_811	0	4e-06	0	0	0	0	k__Fungi;p__Ascomycota;c__Sordariomycetes;o__Hypocreales
OTU_812	0	1.1e-05	0	0	0	0	k__Fungi;p__Ascomycota;c__Saccharomycetes;o__Saccharomycetales;f__Saccharomycetaceae
OTU_813	0	0	0	4e-06	0	0	k__Fungi;p__Ascomycota;c__Leotiomycetes;o__Incertae_sedis_Leotiomycetes;f__Incertae_sedis_Leotiomycetes
OTU_814	0	4e-06	0	0	0	0	k__Fungi;p__Ascomycota
OTU_815	4e-06	0	0	0	0	0	k__Fungi;p__Ascomycota;c__Sordariomycetes;o__Microascales;f__Microascaceae
OTU_816	0	0	7e-06	0	0	0	No blast hit
OTU_817	0	4e-06	0	0	0	0	k__Fungi;p__Ascomycota;c__Saccharomycetes;o__Saccharomycetales;f__Saccharomycetaceae
OTU_818	2.2e-05	0	0	0	0	0	k__Fungi;p__Ascomycota;c__Pezizomycetes;o__Pezizales
OTU_819	0	0	0	4e-06	0	0	No blast hit
OTU_820	0	0	0	4e-06	0	0	k__Fungi;p__Ascomycota;c__Eurotiomycetes;o__Chaetothyriales;f__Herpotrichiellaceae
OTU_821	0	0	0	0	0	0	k__Fungi;p__Ascomycota;c__Sordariomycetes
OTU_822	0	0	0	4e-06	0	0	k__Fungi;p__Basidiomycota;c__Agaricomycetes;o__Hymenochaetales;f__Schizoporaceae;g__Hyphodontia;s__Hyphodontia flavipora
OTU_823	0	0	0	0	0	4e-06	k__Fungi;p__Ascomycota
OTU_824	4e-06	0	0	0	0	0	k__Fungi;p__Ascomycota;c__Dothideomycetes;o__Pleosporales;f__Massarinaceae
OTU_825	0	0	0	0	0	0	k__Fungi;p__Ascomycota;c__Eurotiomycetes;o__Chaetothyriales;f__Herpotrichiellaceae;g__Rhinocladiella;s__Rhinocladiella atrovirens
OTU_826	0	0	0	0	0	1.1e-05	k__Fungi;p__Ascomycota;c__Saccharomycetes;o__Saccharomycetales
OTU_827	4e-06	0	0	0	0	0	k__Fungi;p__Basidiomycota
OTU_828	0	0	0	7e-06	0	0	No blast hit
OTU_829	0	0	4e-06	4e-06	0	0	No blast hit
OTU_830	4e-06	0	0	0	0	0	k__Fungi;p__Ascomycota;c__Dothideomycetes;o__Pleosporales;f__Sporormiaceae;g__Westerdykella
OTU_831	0	0.000123	0	0	0	0	No blast hit
OTU_832	0	0	0	0	4e-06	0	k__Fungi;p__Ascomycota
OTU_833	0	0	0	0	0	0	k__Fungi;p__Ascomycota;c__Dothideomycetes;o__Pleosporales;f__Pleosporaceae;g__Alternaria;s__Alternaria pluriseptata
OTU_834	0.000108	0	0	7.5e-05	0.000168	0	k__Fungi;p__Ascomycota;c__Saccharomycetes;o__Saccharomycetales;f__Trichomonascaceae
OTU_835	0	0	7e-06	0	0	0	No blast hit
OTU_836	0	0	0	0	0	0	k__Fungi;p__Ascomycota;c__Sordariomycetes;o__Ophiostomatales;f__Ophiostomataceae
OTU_837	0	0	0	0	0	0	k__Fungi;p__Ascomycota;c__Saccharomycetes;o__Saccharomycetales;f__Saccharomycetaceae
OTU_838	0	0	0	4e-06	0	0	k__Fungi;p__Ascomycota;c__Eurotiomycetes;o__Chaetothyriales;f__Herpotrichiellaceae
OTU_839	0	0	7e-06	0	0	0	No blast hit
OTU_840	0	0	0	4e-06	0	0	k__Fungi;p__Basidiomycota;c__Agaricomycetes
OTU_841	0	0	0.000388	0.000175	0.000347	0.032608	No blast hit
OTU_842	7e-06	0	0	0	0	0	No blast hit
OTU_843	0	4e-06	0	0	0	0	k__Fungi;p__Ascomycota
OTU_844	0	0	0	7e-06	0	0	k__Fungi;p__Ascomycota;c__Dothideomycetes
OTU_845	4e-06	0	0	0	0	0	k__Fungi;p__Basidiomycota;c__Agaricomycetes;o__Sebacinales;f__Sebacinaceae
OTU_846	0	4e-06	0	0	0	0	k__Fungi;p__Ascomycota;c__Sordariomycetes
OTU_847	0	0	0	0	4e-06	0	No blast hit
OTU_848	4e-06	0	0	0	0	0	No blast hit
OTU_849	4e-06	0	0	0	0	0	k__Fungi;p__Ascomycota;c__Dothideomycetes
OTU_850	4e-06	4e-06	0	0	0	0	k__Fungi;p__Basidiomycota;c__Agaricomycetes
OTU_851	0	0	0	0	0	0	No blast hit
OTU_852	0	0	0	4e-06	0	0	No blast hit
OTU_853	0	0	0	7e-06	0	0	No blast hit
OTU_854	1.1e-05	0	0	0	0	0	k__Fungi;p__Ascomycota;c__Eurotiomycetes;o__Arachnomycetales;f__Arachnomycetaceae;g__Arachnomyces;s__Arachnomyces nodosetosus
OTU_855	4e-06	0	0	0	0	0	No blast hit
OTU_856	7e-06	0	0	0	0	0	k__Fungi;p__Basidiomycota;c__Agaricomycetes;o__Russulales;f__Russulaceae
OTU_857	0	0	7e-06	1.1e-05	0	0	k__Fungi;p__Basidiomycota;c__Agaricomycetes
OTU_858	0	0	0	0	0	7e-06	k__Fungi;p__Ascomycota;c__Lecanoromycetes;o__Lecanorales;f__Lecanoraceae;g__Lecanora;s__Lecanora orosthea
OTU_859	0	7e-06	0	0.000149	1.5e-05	7e-06	k__Fungi;p__Ascomycota;c__Sordariomycetes;o__Ophiostomatales;f__Ophiostomataceae
OTU_860	0	4e-06	0	0	0	0	k__Fungi;p__Ascomycota;c__Dothideomycetes;o__Pleosporales;f__Incertae_sedis_Pleosporales
OTU_861	4e-06	0	0	0	4e-06	0	k__Fungi;p__Ascomycota;c__Leotiomycetes;o__Incertae_sedis_Leotiomycetes;f__Myxotrichaceae
OTU_862	7e-06	0	0	4e-06	0	0	k__Fungi;p__Ascomycota
OTU_863	0	0	0	0	0	0	k__Fungi;p__Basidiomycota;c__Agaricomycetes;o__Atheliales;f__Atheliaceae
OTU_864	0	0	0	0	4e-06	0	k__Fungi;p__Ascomycota;c__Leotiomycetes;o__Incertae_sedis_Leotiomycetes;f__Myxotrichaceae;g__Oidiodendron;s__Oidiodendron maius
OTU_865	7e-06	0	0	4e-06	0	0	k__Fungi;p__Ascomycota;c__Sordariomycetes;o__Trichosphaeriales;f__Incertae_sedis_Trichosphaeriales;g__Khuskia;s__Khuskia oryzae
OTU_866	0	0	0	0	0	4e-06	k__Fungi;p__Ascomycota;c__Saccharomycetes;o__Saccharomycetales;f__Incertae_sedis_Saccharomycetales;g__Candida;s__Candida molendinolei
OTU_867	0	7e-06	0	0	0	0	k__Fungi;p__Ascomycota;c__Dothideomycetes
OTU_868	0	1.1e-05	0	0	0	0	k__Fungi;p__Ascomycota;c__Sordariomycetes;o__Coniochaetales;f__Coniochaetaceae
OTU_869	0	0	0	0	0	0	k__Fungi;p__Basidiomycota;c__Agaricomycetes;o__Thelephorales
OTU_870	1.5e-05	0	0	0	0	0	No blast hit
OTU_871	0	0	7e-06	7e-06	0	0	No blast hit
OTU_872	7e-06	0	0	0	0	0	k__Fungi;p__Ascomycota;c__Incertae_sedis_Ascomycota;o__Incertae_sedis_Ascomycota;f__Incertae_sedis_Ascomycota
OTU_873	0	0	0	0	4e-06	0	k__Fungi;p__Basidiomycota;c__Agaricomycetes;o__Agaricales;f__Hygrophoraceae;g__Hygrophorus;s__Hygrophorus olivaceoalbus
OTU_874	0	4e-06	0	0	0	0	k__Fungi;p__Ascomycota;c__Lecanoromycetes;o__Lecanorales;f__Ramalinaceae;g__Japewia;s__Japewia subaurifera
OTU_875	0	0	0	0	0	0	k__Fungi;p__Ascomycota;c__Sordariomycetes;o__Microascales;f__Microascaceae
OTU_876	0	0	0	4e-06	0	4e-06	k__Fungi;p__Basidiomycota;c__Microbotryomycetes;o__Sporidiobolales;f__Incertae_sedis_Sporidiobolales
OTU_877	0	7e-06	0	0	0	0	k__Fungi;p__Ascomycota;c__Eurotiomycetes;o__Chaetothyriales;f__Herpotrichiellaceae
OTU_878	0	0	0	0	7e-06	0	No blast hit
OTU_879	0	4e-06	0	0	0	0	k__Fungi;p__Ascomycota;c__Sordariomycetes;o__Hypocreales;f__Incertae_sedis_Hypocreales;g__Myrothecium;s__Myrothecium leucotrichum
OTU_880	4e-06	0	0	0	0	0	k__Fungi;p__Ascomycota;c__Sordariomycetes;o__Hypocreales;f__Hypocreaceae;g__Trichoderma
OTU_881	0	0	0	0	4e-06	0	k__Fungi;p__Basidiomycota;c__Agaricomycetes;o__Agaricales;f__Cortinariaceae
OTU_882	4e-06	4e-06	0	0	0	0	k__Fungi;p__Ascomycota;c__Dothideomycetes;o__Capnodiales
OTU_883	0	0	0	0	0	0	k__Fungi;p__Ascomycota;c__Dothideomycetes;o__Capnodiales;f__Mycosphaerellaceae
OTU_884	0	0	0	7e-06	0	0	No blast hit
OTU_885	4e-06	0	0	0	0	0	No blast hit
OTU_886	0	0	0	0	0.000198	0.000175	k__Fungi;p__Ascomycota;c__Saccharomycetes;o__Saccharomycetales;f__Incertae_sedis_Saccharomycetales;g__Candida;s__Candida pattaniensis
OTU_887	0	0	0	4e-06	0	0	No blast hit
OTU_888	0	0	0	0	0	0	k__Fungi;p__Ascomycota;c__Saccharomycetes;o__Saccharomycetales;f__Incertae_sedis_Saccharomycetales;g__Candida
OTU_889	7e-06	0	0	0	0	0	k__Fungi;p__Ascomycota;c__Dothideomycetes;o__Pleosporales
OTU_890	0	0	4e-06	0	0	0	k__Fungi;p__Ascomycota;c__Saccharomycetes;o__Saccharomycetales
OTU_891	7e-06	0	0	0	0	0	k__Fungi;p__Ascomycota;c__Saccharomycetes;o__Saccharomycetales;f__Incertae_sedis_Saccharomycetales;g__Candida
OTU_892	4e-06	0	0	0	0	0	No blast hit
OTU_893	1.1e-05	0	0	0	0.000142	3.7e-05	k__Fungi;p__Ascomycota;c__Sordariomycetes;o__Microascales;f__Microascaceae;g__Graphium;s__Graphium laricis
OTU_894	4e-06	0	0	0	0	0	k__Fungi;p__Basidiomycota;c__Agaricomycetes;o__Agaricales;f__Amanitaceae;g__Amanita;s__Amanita altipes
OTU_895	0	0	0	0	0	4e-06	k__Fungi;p__Basidiomycota;c__Exobasidiomycetes
OTU_896	0	0	1.1e-05	0	0	0	k__Fungi;p__Basidiomycota;c__Exobasidiomycetes
OTU_897	7e-06	4e-06	0	0	0	0	k__Fungi;p__Basidiomycota;c__Agaricomycetes;o__Polyporales;f__Ganodermataceae;g__Ganoderma
OTU_898	7e-06	4e-06	0	0	0	4e-06	k__Fungi;p__Ascomycota;c__Leotiomycetes;o__Thelebolales;f__Thelebolaceae;g__Thelebolus;s__Thelebolus ellipsoideus
OTU_899	1.9e-05	0	0	0	0	0	k__Fungi;p__Ascomycota;c__Eurotiomycetes;o__Eurotiales;f__Trichocomaceae;g__Penicillium;s__Penicillium expansum
OTU_900	7e-06	0	0	0	0	0	k__Fungi;p__Ascomycota;c__Incertae_sedis_Ascomycota;o__Incertae_sedis_Ascomycota;f__Incertae_sedis_Ascomycota
OTU_901	0	4e-06	0	0	0	0	k__Fungi;p__Basidiomycota;c__Agaricomycetes;o__Atheliales
OTU_902	0	0	0	0	0	4e-06	k__Fungi;p__Ascomycota;c__Sordariomycetes;o__Hypocreales;f__Nectriaceae;g__Allantonectria;s__Allantonectria miltina
OTU_903	0	1.1e-05	0	0	0	0	No blast hit
OTU_904	0	0	0	0	7e-06	0	k__Fungi;p__Ascomycota;c__Sordariomycetes;o__Hypocreales;f__Bionectriaceae;g__Clonostachys;s__Clonostachys candelabrum
OTU_905	1.9e-05	0	0	0	0	0	k__Fungi;p__Ascomycota
OTU_906	7e-06	0	4e-06	0	0	0	k__Fungi;p__Ascomycota;c__Dothideomycetes;o__Pleosporales
OTU_907	0	0	0	7e-06	0	0	k__Fungi;p__Ascomycota;c__Eurotiomycetes;o__Eurotiales;f__Trichocomaceae;g__Sagenomella;s__Sagenomella striatispora
OTU_908	0	0	0	0	0	0	No blast hit
OTU_909	1.5e-05	0	0	0	0	0	k__Fungi;p__Basidiomycota;c__Agaricomycetes;o__Agaricales;f__Strophariaceae;g__Hypholoma
OTU_910	0	0	0	0	0	0	k__Fungi;p__Ascomycota;c__Eurotiomycetes
OTU_911	0	0	0	0	0	0	k__Fungi;p__Ascomycota;c__Orbiliomycetes;o__Orbiliales
OTU_912	0	0	0	0	1.1e-05	0	k__Fungi;p__Ascomycota;c__Leotiomycetes;o__Incertae_sedis_Leotiomycetes;f__Myxotrichaceae
OTU_913	7e-06	0	0	0	0	0	k__Fungi;p__Ascomycota;c__Saccharomycetes;o__Saccharomycetales;f__Incertae_sedis_Saccharomycetales
OTU_914	0	0	0	7e-06	0	0	k__Fungi;p__Ascomycota
OTU_915	0	0	0	4e-06	0	0	k__Fungi;p__Ascomycota;c__Leotiomycetes
OTU_916	1.5e-05	0	0	0	0	0	k__Fungi;p__Ascomycota;c__Incertae_sedis_Ascomycota;o__Incertae_sedis_Ascomycota;f__Pseudeurotiaceae;g__Pseudeurotium;s__Pseudeurotium desertorum
OTU_917	7e-06	7e-06	0	0	0	0	k__Fungi;p__Ascomycota;c__Sordariomycetes;o__Hypocreales;f__Incertae_sedis_Hypocreales;g__Acremonium;s__Acremonium antarcticum
OTU_918	0	0	0	0	0	7e-06	k__Fungi;p__Basidiomycota;c__Microbotryomycetes
OTU_919	0	0	0	0	0	0	No blast hit
OTU_920	0	0	0	0	0	0	No blast hit
OTU_921	0	0	0	0	0	7e-06	k__Fungi;p__Ascomycota;c__Dothideomycetes
OTU_922	1.5e-05	0.003122	0	4e-06	0	0	k__Fungi;p__Ascomycota;c__Sordariomycetes;o__Hypocreales;f__Nectriaceae
OTU_923	0	0	0	0	0	0	k__Fungi;p__Ascomycota;c__Saccharomycetes;o__Saccharomycetales;f__Incertae_sedis_Saccharomycetales
OTU_924	0	0	0	0	0	0	k__Fungi;p__Ascomycota;c__Sordariomycetes;o__Hypocreales;f__Incertae_sedis_Hypocreales;g__Acremonium;s__Acremonium chrysogenum
OTU_925	4e-06	0	0	0	0	0	No blast hit
OTU_926	4e-06	0	0	0	0	0	k__Fungi;p__Basidiomycota;c__Agaricomycetes;o__Agaricales;f__Inocybaceae
OTU_927	0	0	0	7e-06	0	0	k__Fungi;p__Ascomycota;c__Sordariomycetes
OTU_928	0	0	0	0	0	0	k__Fungi;p__Ascomycota;c__Leotiomycetes;o__Helotiales;f__Sclerotiniaceae;g__Botrytis
OTU_929	7e-06	0	0	0	0	0	k__Fungi;p__Ascomycota;c__Dothideomycetes;o__Pleosporales;f__Leptosphaeriaceae
OTU_930	4e-06	0	0	0	0	0	k__Fungi;p__Ascomycota;c__Leotiomycetes
OTU_931	0	0	0	0	0	0	No blast hit
OTU_932	0	0	7e-06	0	0	0	No blast hit
OTU_933	1.5e-05	0	0	0	0	0	k__Fungi;p__Basidiomycota;c__Agaricomycetes;o__Cantharellales;f__Clavulinaceae
OTU_934	7e-06	0	0	3e-05	1.1e-05	0	k__Fungi;p__Ascomycota;c__Saccharomycetes;o__Saccharomycetales;f__Trichomonascaceae;g__Blastobotrys;s__Blastobotrys proliferans
OTU_935	0	0	0	4e-06	0	0	No blast hit
OTU_936	0	0	0.000574	0	0	9.7e-05	No blast hit
OTU_937	0	0	0	4e-06	0	0	k__Fungi;p__Ascomycota;c__Sordariomycetes;o__Magnaporthales;f__Magnaporthaceae;g__Buergenerula;s__Buergenerula spartinae
OTU_938	0	0	0	0	0	0	k__Fungi;p__Basidiomycota;c__Agaricomycetes;o__Agaricales;f__Inocybaceae;g__Inocybe
OTU_939	0	0	0	0	0	0	k__Fungi;p__Ascomycota;c__Eurotiomycetes;o__Chaetothyriales
OTU_940	4e-06	0	0	0	0	0	k__Fungi;p__Basidiomycota;c__Agaricomycetes
OTU_941	0	0	0	0	0	0	No blast hit
OTU_942	0	0	0	0	0	0	k__Fungi;p__Ascomycota;c__Dothideomycetes;o__Botryosphaeriales
OTU_943	7e-06	0	0	0	0	0	No blast hit
OTU_944	0	0	0	0	0	0	No blast hit
OTU_945	0	0	0	0	0	0	No blast hit
OTU_946	0	4e-06	0	0	0	0	k__Fungi;p__Ascomycota;c__Sordariomycetes;o__Incertae_sedis_Sordariomycetes;f__Plectosphaerellaceae
OTU_947	0	0	0	1.5e-05	0	0	No blast hit
OTU_948	0	0	0	0	0	1.1e-05	k__Fungi;p__Ascomycota;c__Dothideomycetes;o__Botryosphaeriales;f__Botryosphaeriaceae
OTU_949	1.1e-05	0	0	0	0	0	k__Fungi;p__Ascomycota
OTU_950	0	0	0	0	0	0	k__Fungi;p__Ascomycota;c__Leotiomycetes;o__Incertae_sedis_Leotiomycetes;f__Incertae_sedis_Leotiomycetes
OTU_951	0	0	0	0	0	0	No blast hit
OTU_952	0	0	0	1.1e-05	0	0	k__Fungi;p__Ascomycota;c__Leotiomycetes;o__Incertae_sedis_Leotiomycetes;f__Myxotrichaceae
OTU_953	0	4e-06	0	0	0	0	k__Fungi;p__Ascomycota;c__Incertae_sedis_Ascomycota;o__Incertae_sedis_Ascomycota;f__Pseudeurotiaceae;g__Leuconeurospora;s__Leuconeurospora pulcherrima
OTU_954	0	0	0	4e-06	0	0	k__Fungi;p__Basidiomycota;c__Agaricomycetes;o__Agaricales;f__Hygrophoraceae;g__Gliophorus;s__Gliophorus graminicolor
OTU_955	4e-06	0	0	0	0	0	No blast hit
