# Supplementary material for: Core Mycobiome and Their Ecological Relevance in the Gut of Five Ips Bark Beetles (Coleoptera: Curculionidae: Scolytinae)
Source: Front Microbiol. 2020 Sep 3;11:568853. doi: 10.3389/fmicb.2020.568853 (PMC7496905; doi:10.3389/fmicb.2020.568853)
Supplement: Supplementary file 4 [file Table_4.XLS]

## Sheet: Relative otu abundance_phylum
Taxonomy	PP	IAC	SX	IC	ID	IT	Tax_detail
Ascomycota	0.435798	0.500145	0.264107	0.907846	0.968235	0.94737	k__Fungi;p__Ascomycota;
Basidiomycota	0.044277	0.010263	0.002738	0.005607	0.002343	0.001395	k__Fungi;p__Basidiomycota;
Zygomycota	0.000548	0.015787	8.6e-05	0.000127	3e-05	2.2e-05	k__Fungi;p__Zygomycota;
Chytridiomycota	3.4e-05	0	1.5e-05	0	4e-06	1.1e-05	k__Fungi;p__Chytridiomycota;
Others	0.519343	0.473805	0.733054	0.08642	0.029389	0.051201	Others

## Sheet: Relative otu abundance_class
Taxonomy	PP	IAC	SX	IC	ID	IT	Tax_detail
Saccharomycetes	0.190654	0.277216	0.118174	0.83812	0.903388	0.78981	k__Fungi;p__Ascomycota;c__Saccharomycetes;
Sordariomycetes	0.116771	0.218793	0.117962	0.034052	0.051913	0.118163	k__Fungi;p__Ascomycota;c__Sordariomycetes;
Eurotiomycetes	0.121196	0.002757	0.012516	0.028796	0.010919	0.037163	k__Fungi;p__Ascomycota;c__Eurotiomycetes;
Agaricomycetes	0.042636	0.000921	0.002067	0.001876	0.000224	0.000153	k__Fungi;p__Basidiomycota;c__Agaricomycetes;
Incertae_sedis_Zygomycota	0.000548	0.015787	8.6e-05	0.000127	3e-05	2.2e-05	k__Fungi;p__Zygomycota;c__Incertae_sedis_Zygomycota;
Dothideomycetes	0.001847	0.000388	0.012243	0.002205	0.000791	0.001541	k__Fungi;p__Ascomycota;c__Dothideomycetes;
Microbotryomycetes	6.3e-05	0.007965	0.000175	0.002257	0.000276	0.000325	k__Fungi;p__Basidiomycota;c__Microbotryomycetes;
Leotiomycetes	0.002003	0.000246	0.002869	0.001891	0.00031	0.000515	k__Fungi;p__Ascomycota;c__Leotiomycetes;
Lecanoromycetes	7e-06	1.1e-05	2.2e-05	0.002414	6e-05	3.7e-05	k__Fungi;p__Ascomycota;c__Lecanoromycetes;
Tremellomycetes	0.000131	0.000601	0.000354	0.001224	0.001395	0.000339	k__Fungi;p__Basidiomycota;c__Tremellomycetes;
Incertae_sedis_Basidiomycota	0.001317	9.3e-05	6.3e-05	0.000116	0.000425	0.000422	k__Fungi;p__Basidiomycota;c__Incertae_sedis_Basidiomycota;
Incertae_sedis_Ascomycota	0.000754	1.5e-05	7e-06	3e-05	7e-06	3e-05	k__Fungi;p__Ascomycota;c__Incertae_sedis_Ascomycota;
Exobasidiomycetes	7e-06	0	1.1e-05	0.000101	0	7e-06	k__Fungi;p__Basidiomycota;c__Exobasidiomycetes;
Pezizomycetes	0.00022	1.9e-05	0	0	0	0	k__Fungi;p__Ascomycota;c__Pezizomycetes;
Agaricostilbomycetes	5.6e-05	4e-06	0	7e-06	7e-06	6.7e-05	k__Fungi;p__Basidiomycota;c__Agaricostilbomycetes;
Wallemiomycetes	5.2e-05	0	0	1.9e-05	0	0	k__Fungi;p__Basidiomycota;c__Wallemiomycetes;
Atractiellomycetes	0	4e-06	5.6e-05	4e-06	7e-06	3.4e-05	k__Fungi;p__Basidiomycota;c__Atractiellomycetes;
Pucciniomycetes	0	0	0	0	0	1.9e-05	k__Fungi;p__Basidiomycota;c__Pucciniomycetes;
Chytridiomycetes	3.4e-05	0	1.5e-05	0	4e-06	1.1e-05	k__Fungi;p__Chytridiomycota;c__Chytridiomycetes;
Cystobasidiomycetes	1.1e-05	0	0	0	7e-06	0	k__Fungi;p__Basidiomycota;c__Cystobasidiomycetes;
Orbiliomycetes	0	7e-06	3.7e-05	7e-06	0	7e-06	k__Fungi;p__Ascomycota;c__Orbiliomycetes;
Geoglossomycetes	0	0	0	0	7e-06	0	k__Fungi;p__Ascomycota;c__Geoglossomycetes;
Archaeorhizomycetes	0	0	0	0	4e-06	0	k__Fungi;p__Ascomycota;c__Archaeorhizomycetes;
Others	0.521693	0.475174	0.733342	0.086756	0.030224	0.051335	Others

## Sheet: Relative otu abundance_genus
Taxonomy	PP	IAC	SX	IC	ID	IT	Tax_detail
Nakazawaea	3e-05	0.011841	0.00639	0.700644	0.004749	0.069618	k__Fungi;p__Ascomycota;c__Saccharomycetes;o__Saccharomycetales;f__Pichiaceae;g__Nakazawaea;
Cyberlindnera	4e-06	0.084805	0.011393	0.008782	0.351833	0.46008	k__Fungi;p__Ascomycota;c__Saccharomycetes;o__Saccharomycetales;f__Incertae_sedis_Saccharomycetales;g__Cyberlindnera;
Yamadazyma	0.011609	0.000795	0.007323	0.0279	0.333024	0.015985	k__Fungi;p__Ascomycota;c__Saccharomycetes;o__Saccharomycetales;f__Pichiaceae;g__Yamadazyma;
Blastobotrys	0.128437	4e-06	3.7e-05	0.062788	0.144911	0.006226	k__Fungi;p__Ascomycota;c__Saccharomycetes;o__Saccharomycetales;f__Trichomonascaceae;g__Blastobotrys;
Kuraishia	0.024733	0.109322	0.000851	0.002727	0.005696	0.010341	k__Fungi;p__Ascomycota;c__Saccharomycetes;o__Saccharomycetales;f__Saccharomycetaceae;g__Kuraishia;
Fusarium	0.000944	0.031702	4.8e-05	2.6e-05	4.8e-05	0.002059	k__Fungi;p__Ascomycota;c__Sordariomycetes;o__Hypocreales;f__Nectriaceae;g__Fusarium;
Talaromyces	0.096134	0.000582	0.000172	0.000354	0.000336	0.001903	k__Fungi;p__Ascomycota;c__Eurotiomycetes;o__Eurotiales;f__Trichocomaceae;g__Talaromyces;
Danielozyma	0.020797	6.7e-05	0	7e-06	6.7e-05	0	k__Fungi;p__Ascomycota;c__Saccharomycetes;o__Incertae_sedis_Saccharomycetes;f__Incertae_sedis_Saccharomycetes;g__Danielozyma;
Penicillium	0.019585	0.000183	0.012229	0.024035	0.010304	0.035063	k__Fungi;p__Ascomycota;c__Eurotiomycetes;o__Eurotiales;f__Trichocomaceae;g__Penicillium;
Cladosporium	0.000425	0.000112	0.012158	0.002026	0.000228	0.001272	k__Fungi;p__Ascomycota;c__Dothideomycetes;o__Capnodiales;f__Davidiellaceae;g__Cladosporium;
Candida	0.00044	7.1e-05	0.000567	0.011934	0.000358	0.000582	k__Fungi;p__Ascomycota;c__Saccharomycetes;o__Saccharomycetales;f__Incertae_sedis_Saccharomycetales;g__Candida;
Myrmecridium	3.4e-05	0.010442	0	0	0	0	k__Fungi;p__Ascomycota;c__Sordariomycetes;o__Incertae_sedis_Sordariomycetes;f__Incertae_sedis_Sordariomycetes;g__Myrmecridium;
Peterozyma	0	0	0.007233	4.8e-05	4e-06	0.000325	k__Fungi;p__Ascomycota;c__Saccharomycetes;o__Saccharomycetales;f__Incertae_sedis_Saccharomycetales;g__Peterozyma;
Ophiostoma	3e-05	0.000295	0.000354	7.5e-05	0.00294	0.006965	k__Fungi;p__Ascomycota;c__Sordariomycetes;o__Ophiostomatales;f__Ophiostomataceae;g__Ophiostoma;
Beauveria	0.007095	7e-06	0.000261	2.6e-05	3.7e-05	0.006416	k__Fungi;p__Ascomycota;c__Sordariomycetes;o__Hypocreales;f__Cordycipitaceae;g__Beauveria;
Acremonium	0.000108	0.00573	1.9e-05	0	0	0	k__Fungi;p__Ascomycota;c__Sordariomycetes;o__Hypocreales;f__Incertae_sedis_Hypocreales;g__Acremonium;
Mortierella	0.000142	0.003436	6.7e-05	0.000116	0	4e-06	k__Fungi;p__Zygomycota;c__Incertae_sedis_Zygomycota;o__Mortierellales;f__Mortierellaceae;g__Mortierella;
Ceratocystis	7.5e-05	0.00382	0.001529	0.00319	7e-06	0.000157	k__Fungi;p__Ascomycota;c__Sordariomycetes;o__Microascales;f__Ceratocystidaceae;g__Ceratocystis;
Ogataea	5.6e-05	0.002906	0.000172	6.7e-05	0.000246	0.004245	k__Fungi;p__Ascomycota;c__Saccharomycetes;o__Saccharomycetales;f__Pichiaceae;g__Ogataea;
Rhodotorula	6.3e-05	0.00795	0.000149	0.002253	0.000269	0.000302	k__Fungi;p__Basidiomycota;c__Microbotryomycetes;o__Sporidiobolales;f__Incertae_sedis_Sporidiobolales;g__Rhodotorula;
Lecanicillium	0	0	0.001813	7e-06	0	0.000101	k__Fungi;p__Ascomycota;c__Sordariomycetes;o__Hypocreales;f__Cordycipitaceae;g__Lecanicillium;
Hypocenomyce	0	0	2.2e-05	0.002402	2.6e-05	2.2e-05	k__Fungi;p__Ascomycota;c__Lecanoromycetes;o__Umbilicariales;f__Ophioparmaceae;g__Hypocenomyce;
Trichoderma	7.5e-05	0.00031	0.000213	1.5e-05	1.9e-05	0.002097	k__Fungi;p__Ascomycota;c__Sordariomycetes;o__Hypocreales;f__Hypocreaceae;g__Trichoderma;
Cryptococcus	9e-05	0.000545	0.000313	0.000616	0.001153	0.000272	k__Fungi;p__Basidiomycota;c__Tremellomycetes;o__Tremellales;f__Incertae_sedis_Tremellales;g__Cryptococcus;
Aspergillus	0.002466	4.5e-05	1.5e-05	2.2e-05	7.5e-05	3.7e-05	k__Fungi;p__Ascomycota;c__Eurotiomycetes;o__Eurotiales;f__Trichocomaceae;g__Aspergillus;
Ceratocystiopsis	0.000127	1.5e-05	1.9e-05	0	0.000153	0.00081	k__Fungi;p__Ascomycota;c__Sordariomycetes;o__Ophiostomatales;f__Ophiostomataceae;g__Ceratocystiopsis;
Saccharomycopsis	2.2e-05	0.001552	2.2e-05	0.000168	0.000295	4.8e-05	k__Fungi;p__Ascomycota;c__Saccharomycetes;o__Saccharomycetales;f__Saccharomycopsidaceae;g__Saccharomycopsis;
Alternaria	0.000798	0.000168	1.1e-05	1.1e-05	1.9e-05	6.3e-05	k__Fungi;p__Ascomycota;c__Dothideomycetes;o__Pleosporales;f__Pleosporaceae;g__Alternaria;
Rigidoporus	0.000638	2.2e-05	0	0	0	0	k__Fungi;p__Basidiomycota;c__Agaricomycetes;o__Polyporales;f__Meripilaceae;g__Rigidoporus;
Ilyonectria	0	0.000537	1.1e-05	0	0	0	k__Fungi;p__Ascomycota;c__Sordariomycetes;o__Hypocreales;f__Incertae_sedis_Hypocreales;g__Ilyonectria;
Lactarius	0.000451	1.5e-05	0	0	0	0	k__Fungi;p__Basidiomycota;c__Agaricomycetes;o__Russulales;f__Russulaceae;g__Lactarius;
Nematoctonus	0	0	0.000944	4e-06	0	5.2e-05	k__Fungi;p__Basidiomycota;c__Agaricomycetes;o__Agaricales;f__Pleurotaceae;g__Nematoctonus;
Malassezia	0.001078	4.8e-05	3e-05	9.7e-05	0.000358	0.000351	k__Fungi;p__Basidiomycota;c__Incertae_sedis_Basidiomycota;o__Malasseziales;f__Malasseziaceae;g__Malassezia;
Wickerhamomyces	0.000727	4e-06	0	0	0	0	k__Fungi;p__Ascomycota;c__Saccharomycetes;o__Saccharomycetales;f__Incertae_sedis_Saccharomycetales;g__Wickerhamomyces;
Rhizopus	0.000302	0	0	0	0	0	k__Fungi;p__Zygomycota;c__Incertae_sedis_Zygomycota;o__Mucorales;f__Rhizopodaceae;g__Rhizopus;
Aureobasidium	0.000302	4e-06	7e-06	7e-06	0	1.5e-05	k__Fungi;p__Ascomycota;c__Dothideomycetes;o__Dothideales;f__Dothioraceae;g__Aureobasidium;
Oidiodendron	0.000414	4e-06	7e-06	0	3.4e-05	7.5e-05	k__Fungi;p__Ascomycota;c__Leotiomycetes;o__Incertae_sedis_Leotiomycetes;f__Myxotrichaceae;g__Oidiodendron;
Exidia	0.000157	6.3e-05	0	0	0	0	k__Fungi;p__Basidiomycota;c__Agaricomycetes;o__Auriculariales;f__Incertae_sedis_Auriculariales;g__Exidia;
Issatchenkia	0.000205	0	0	0	0	0	k__Fungi;p__Ascomycota;c__Saccharomycetes;o__Saccharomycetales;f__Pichiaceae;g__Issatchenkia;
Graphium	1.1e-05	0	0	0	0.000142	3.7e-05	k__Fungi;p__Ascomycota;c__Sordariomycetes;o__Microascales;f__Microascaceae;g__Graphium;
Cuniculitrema	0	7e-06	2.2e-05	7.5e-05	0.000231	5.2e-05	k__Fungi;p__Basidiomycota;c__Tremellomycetes;o__Tremellales;f__Incertae_sedis_Tremellales;g__Cuniculitrema;
Pseudeurotium	0.000425	0	0	0	0	0	k__Fungi;p__Ascomycota;c__Incertae_sedis_Ascomycota;o__Incertae_sedis_Ascomycota;f__Pseudeurotiaceae;g__Pseudeurotium;
Hyphopichia	0.000112	0	0	0	0	0	k__Fungi;p__Ascomycota;c__Saccharomycetes;o__Saccharomycetales;f__Pichiaceae;g__Hyphopichia;
Cladorrhinum	1.9e-05	9.7e-05	0	0	0	0	k__Fungi;p__Ascomycota;c__Sordariomycetes;o__Sordariales;f__Lasiosphaeriaceae;g__Cladorrhinum;
Lipomyces	0	0.000168	0	0	0	0	k__Fungi;p__Ascomycota;c__Saccharomycetes;o__Saccharomycetales;f__Lipomycetaceae;g__Lipomyces;
Coprinellus	0	0	0	7.1e-05	0	0	k__Fungi;p__Basidiomycota;c__Agaricomycetes;o__Agaricales;f__Psathyrellaceae;g__Coprinellus;
Staphylotrichum	0.000205	0	4e-06	1.1e-05	7e-06	0	k__Fungi;p__Ascomycota;c__Incertae_sedis_Ascomycota;o__Incertae_sedis_Ascomycota;f__Incertae_sedis_Ascomycota;g__Staphylotrichum;
Clavulinopsis	0	0	4.5e-05	7.1e-05	0	0	k__Fungi;p__Basidiomycota;c__Agaricomycetes;o__Agaricales;f__Clavariaceae;g__Clavulinopsis;
Chionosphaera	0	4e-06	0	4e-06	7e-06	6.7e-05	k__Fungi;p__Basidiomycota;c__Agaricostilbomycetes;o__Agaricostilbales;f__Chionosphaeraceae;g__Chionosphaera;
Scutellinia	6.3e-05	0	0	0	0	0	k__Fungi;p__Ascomycota;c__Pezizomycetes;o__Pezizales;f__Pyronemataceae;g__Scutellinia;
Stachybotrys	6.3e-05	0	0	0	0	0	k__Fungi;p__Ascomycota;c__Sordariomycetes;o__Hypocreales;f__Incertae_sedis_Hypocreales;g__Stachybotrys;
Cercophora	0.000183	7e-06	0	0	4e-06	0	k__Fungi;p__Ascomycota;c__Sordariomycetes;o__Sordariales;f__Lasiosphaeriaceae;g__Cercophora;
Geotrichum	4.8e-05	0	0	0	0	0	k__Fungi;p__Ascomycota;c__Saccharomycetes;o__Saccharomycetales;f__Dipodascaceae;g__Geotrichum;
Zalerion	6.3e-05	7e-06	0	0	0	0	k__Fungi;p__Ascomycota;c__Sordariomycetes;o__Lulworthiales;f__Lulworthiaceae;g__Zalerion;
Sterigmatomyces	5.6e-05	0	0	0	0	0	k__Fungi;p__Basidiomycota;c__Agaricostilbomycetes;o__Agaricostilbales;f__Agaricostilbaceae;g__Sterigmatomyces;
Cyphellophora	4.5e-05	0	0	3.4e-05	4.1e-05	7e-06	k__Fungi;p__Ascomycota;c__Eurotiomycetes;o__Chaetothyriales;f__Chaetothyriaceae;g__Cyphellophora;
Xylopsora	7e-06	0	0	0	3.4e-05	0	k__Fungi;p__Ascomycota;c__Lecanoromycetes;o__Umbilicariales;f__Umbilicariaceae;g__Xylopsora;
Pichia	8.6e-05	4e-06	0	0	0	0	k__Fungi;p__Ascomycota;c__Saccharomycetes;o__Saccharomycetales;f__Pichiaceae;g__Pichia;
Saccharomyces	6e-05	7e-06	0	0	0	1.1e-05	k__Fungi;p__Ascomycota;c__Saccharomycetes;o__Saccharomycetales;f__Saccharomycetaceae;g__Saccharomyces;
Rhizodermea	3.4e-05	0	0	0	0	0	k__Fungi;p__Ascomycota;c__Leotiomycetes;o__Helotiales;f__Dermateaceae;g__Rhizodermea;
Bryoglossum	0	0	1.1e-05	3.7e-05	0	0	k__Fungi;p__Ascomycota;c__Leotiomycetes;o__Helotiales;f__Hyaloscyphaceae;g__Bryoglossum;
Pezicula	3e-05	4e-06	2.2e-05	7e-06	0	0	k__Fungi;p__Ascomycota;c__Leotiomycetes;o__Helotiales;f__Dermateaceae;g__Pezicula;
Pseudocosmospora	0	0	3e-05	0	0	0	k__Fungi;p__Ascomycota;c__Sordariomycetes;o__Hypocreales;f__Nectriaceae;g__Pseudocosmospora;
Mycena	3e-05	0	0	0	4e-06	4e-06	k__Fungi;p__Basidiomycota;c__Agaricomycetes;o__Agaricales;f__Mycenaceae;g__Mycena;
Sistotrema	3.7e-05	0	4e-06	0	0	0	k__Fungi;p__Basidiomycota;c__Agaricomycetes;o__Cantharellales;f__Hydnaceae;g__Sistotrema;
Therrya	0	0	2.6e-05	0	0	0	k__Fungi;p__Ascomycota;c__Leotiomycetes;o__Rhytismatales;f__Rhytismataceae;g__Therrya;
Chaetomium	6e-05	7e-06	0	0	0	0	k__Fungi;p__Ascomycota;c__Sordariomycetes;o__Sordariales;f__Chaetomiaceae;g__Chaetomium;
Tetracladium	9.7e-05	7e-06	0	0	0	0	k__Fungi;p__Ascomycota;c__Leotiomycetes;o__Helotiales;f__Incertae_sedis_Helotiales;g__Tetracladium;
Chrysosporium	5.2e-05	0	0	0	0	0	k__Fungi;p__Ascomycota;c__Eurotiomycetes;o__Onygenales;f__Onygenaceae;g__Chrysosporium;
Monographella	0	2.2e-05	0	0	0	0	k__Fungi;p__Ascomycota;c__Sordariomycetes;o__Xylariales;f__Incertae_sedis_Xylariales;g__Monographella;
Schizophyllum	2.2e-05	0	0	0	0	0	k__Fungi;p__Basidiomycota;c__Agaricomycetes;o__Agaricales;f__Schizophyllaceae;g__Schizophyllum;
Acephala	0	0	0	0	2.2e-05	0	k__Fungi;p__Ascomycota;c__Leotiomycetes;o__Helotiales;f__Vibrisseaceae;g__Acephala;
Meyerozyma	0	4e-06	0	0	0	2.2e-05	k__Fungi;p__Ascomycota;c__Saccharomycetes;o__Saccharomycetales;f__Debaryomycetaceae;g__Meyerozyma;
Byssochlamys	5.2e-05	0	4e-06	4e-06	0	0	k__Fungi;p__Ascomycota;c__Eurotiomycetes;o__Eurotiales;f__Trichocomaceae;g__Byssochlamys;
Leohumicola	2.2e-05	4e-06	0	0	0	0	k__Fungi;p__Ascomycota;c__Leotiomycetes;o__Incertae_sedis_Leotiomycetes;f__Incertae_sedis_Leotiomycetes;g__Leohumicola;
Tremella	0	1.9e-05	0	1.9e-05	0	0	k__Fungi;p__Basidiomycota;c__Tremellomycetes;o__Tremellales;f__Incertae_sedis_Tremellales;g__Tremella;
Thelidium	0	1.9e-05	0	0	0	0	k__Fungi;p__Ascomycota;c__Eurotiomycetes;o__Verrucariales;f__Verrucariaceae;g__Thelidium;
Pesotum	0	1.9e-05	0	0	0	0	k__Fungi;p__Ascomycota;c__Sordariomycetes;o__Ophiostomatales;f__Ophiostomataceae;g__Pesotum;
Wallemia	1.5e-05	0	0	0	0	0	k__Fungi;p__Basidiomycota;c__Wallemiomycetes;o__Wallemiales;f__Wallemiaceae;g__Wallemia;
Corallomycetella	1.5e-05	0	0	0	0	0	k__Fungi;p__Ascomycota;c__Sordariomycetes;o__Hypocreales;f__Nectriaceae;g__Corallomycetella;
Schizothecium	0	1.5e-05	0	0	0	0	k__Fungi;p__Ascomycota;c__Sordariomycetes;o__Sordariales;f__Lasiosphaeriaceae;g__Schizothecium;
Neocatenulostroma	0	0	0	1.5e-05	0	0	k__Fungi;p__Ascomycota;c__Dothideomycetes;o__Capnodiales;f__Teratosphaeriaceae;g__Neocatenulostroma;
Mucor	1.5e-05	0	1.5e-05	0	0	0	k__Fungi;p__Zygomycota;c__Incertae_sedis_Zygomycota;o__Mucorales;f__Mucoraceae;g__Mucor;
Sporobolomyces	0	0	2.6e-05	0	7e-06	0	k__Fungi;p__Basidiomycota;c__Microbotryomycetes;o__Sporidiobolales;f__Incertae_sedis_Sporidiobolales;g__Sporobolomyces;
Hypholoma	1.5e-05	0	0	0	0	0	k__Fungi;p__Basidiomycota;c__Agaricomycetes;o__Agaricales;f__Strophariaceae;g__Hypholoma;
Psathyrella	1.9e-05	0	0	0	0	0	k__Fungi;p__Basidiomycota;c__Agaricomycetes;o__Agaricales;f__Psathyrellaceae;g__Psathyrella;
Absidia	0	0	4e-06	0	1.1e-05	1.9e-05	k__Fungi;p__Zygomycota;c__Incertae_sedis_Zygomycota;o__Mucorales;f__Cunninghamellaceae;g__Absidia;
Piriformospora	0	0	4e-06	1.1e-05	2.2e-05	0	k__Fungi;p__Basidiomycota;c__Agaricomycetes;o__Sebacinales;f__Sebacinales Group B;g__Piriformospora;
Thelonectria	4.1e-05	0	0	0	0	0	k__Fungi;p__Ascomycota;c__Sordariomycetes;o__Hypocreales;f__Nectriaceae;g__Thelonectria;
Starmerella	1.1e-05	0	0	0	0	0	k__Fungi;p__Ascomycota;c__Saccharomycetes;o__Saccharomycetales;f__Incertae_sedis_Saccharomycetales;g__Starmerella;
Gaeumannomyces	1.9e-05	0	0	0	0	0	k__Fungi;p__Ascomycota;c__Sordariomycetes;o__Magnaporthales;f__Magnaporthaceae;g__Gaeumannomyces;
Russula	4e-06	0	0	1.1e-05	0	4e-06	k__Fungi;p__Basidiomycota;c__Agaricomycetes;o__Russulales;f__Russulaceae;g__Russula;
Sakaguchia	1.1e-05	0	0	0	0	0	k__Fungi;p__Basidiomycota;c__Cystobasidiomycetes;o__Incertae_sedis_Cystobasidiomycetes;f__Incertae_sedis_Cystobasidiomycetes;g__Sakaguchia;
Phialocephala	1.5e-05	4e-06	0	0	0	0	k__Fungi;p__Ascomycota;c__Leotiomycetes;o__Helotiales;f__Vibrisseaceae;g__Phialocephala;
Phialophora	1.1e-05	1.9e-05	0	0	0	0	k__Fungi;p__Ascomycota;c__Eurotiomycetes;o__Chaetothyriales;f__Herpotrichiellaceae;g__Phialophora;
Neonectria	1.1e-05	0	0	0	0	0	k__Fungi;p__Ascomycota;c__Sordariomycetes;o__Hypocreales;f__Nectriaceae;g__Neonectria;
Spizellomyces	2.2e-05	0	0	0	0	0	k__Fungi;p__Chytridiomycota;c__Chytridiomycetes;o__Spizellomycetales;f__Spizellomycetaceae;g__Spizellomyces;
Musicillium	0	1.1e-05	0	0	0	0	k__Fungi;p__Ascomycota;c__Sordariomycetes;o__Incertae_sedis_Sordariomycetes;f__Plectosphaerellaceae;g__Musicillium;
Cordyceps	1.1e-05	0	0	0	0	0	k__Fungi;p__Ascomycota;c__Sordariomycetes;o__Hypocreales;f__Cordycipitaceae;g__Cordyceps;
Myrothecium	1.1e-05	4e-06	0	2.2e-05	0	0	k__Fungi;p__Ascomycota;c__Sordariomycetes;o__Hypocreales;f__Incertae_sedis_Hypocreales;g__Myrothecium;
Thelebolus	7e-06	4e-06	0	0	0	4e-06	k__Fungi;p__Ascomycota;c__Leotiomycetes;o__Thelebolales;f__Thelebolaceae;g__Thelebolus;
Trichothecium	7e-06	0	0	0	0	0	k__Fungi;p__Ascomycota;c__Sordariomycetes;o__Hypocreales;f__Incertae_sedis_Hypocreales;g__Trichothecium;
Microascus	7e-06	0	0	0	0	0	k__Fungi;p__Ascomycota;c__Sordariomycetes;o__Microascales;f__Microascaceae;g__Microascus;
Discosia	0	7e-06	0	0	0	0	k__Fungi;p__Ascomycota;c__Sordariomycetes;o__Xylariales;f__Amphisphaeriaceae;g__Discosia;
Coniophora	7e-06	0	0	0	0	0	k__Fungi;p__Basidiomycota;c__Agaricomycetes;o__Boletales;f__Coniophoraceae;g__Coniophora;
Pseudogymnoascus	7e-06	7e-06	0	0	0	0	k__Fungi;p__Ascomycota;c__Leotiomycetes;o__Incertae_sedis_Leotiomycetes;f__Myxotrichaceae;g__Pseudogymnoascus;
Lecanora	0	0	0	0	0	7e-06	k__Fungi;p__Ascomycota;c__Lecanoromycetes;o__Lecanorales;f__Lecanoraceae;g__Lecanora;
Apodus	1.9e-05	0	0	7e-06	0	0	k__Fungi;p__Ascomycota;c__Sordariomycetes;o__Sordariales;f__Lasiosphaeriaceae;g__Apodus;
Colletotrichum	7e-06	0	0	0	0	0	k__Fungi;p__Ascomycota;c__Sordariomycetes;o__Incertae_sedis_Sordariomycetes;f__Glomerellaceae;g__Colletotrichum;
Luellia	0	0	0	7e-06	0	0	k__Fungi;p__Basidiomycota;c__Agaricomycetes;o__Trechisporales;f__Hydnodontaceae;g__Luellia;
Ganoderma	7e-06	4e-06	0	0	0	0	k__Fungi;p__Basidiomycota;c__Agaricomycetes;o__Polyporales;f__Ganodermataceae;g__Ganoderma;
Tylospora	0	0	0	0	4e-06	7e-06	k__Fungi;p__Basidiomycota;c__Agaricomycetes;o__Atheliales;f__Atheliaceae;g__Tylospora;
Gliophorus	0	0	4e-06	7e-06	0	0	k__Fungi;p__Basidiomycota;c__Agaricomycetes;o__Agaricales;f__Hygrophoraceae;g__Gliophorus;
Fellomyces	0	0	0	4e-06	0	1.1e-05	k__Fungi;p__Basidiomycota;c__Tremellomycetes;o__Tremellales;f__Incertae_sedis_Tremellales;g__Fellomyces;
Emericellopsis	2.2e-05	0	0	0	0	0	k__Fungi;p__Ascomycota;c__Sordariomycetes;o__Hypocreales;f__Incertae_sedis_Hypocreales;g__Emericellopsis;
Itersonilia	7e-06	0	0	0	0	0	k__Fungi;p__Basidiomycota;c__Tremellomycetes;o__Cystofilobasidiales;f__Cystofilobasidiaceae;g__Itersonilia;
Clonostachys	0	0	0	0	7e-06	0	k__Fungi;p__Ascomycota;c__Sordariomycetes;o__Hypocreales;f__Bionectriaceae;g__Clonostachys;
Orbilia	0	7e-06	0	0	0	7e-06	k__Fungi;p__Ascomycota;c__Orbiliomycetes;o__Orbiliales;f__Orbiliaceae;g__Orbilia;
Erythrobasidium	0	0	0	0	7e-06	0	k__Fungi;p__Basidiomycota;c__Cystobasidiomycetes;o__Erythrobasidiales;f__Incertae_sedis_Erythrobasidiales;g__Erythrobasidium;
Fusicolla	1.5e-05	4e-06	0	0	0	0	k__Fungi;p__Ascomycota;c__Sordariomycetes;o__Hypocreales;f__Nectriaceae;g__Fusicolla;
Thanatephorus	4e-06	7e-06	0	0	0	0	k__Fungi;p__Basidiomycota;c__Agaricomycetes;o__Cantharellales;f__Ceratobasidiaceae;g__Thanatephorus;
Scytalidium	1.9e-05	0	0	0	0	0	k__Fungi;p__Ascomycota;c__Leotiomycetes;o__Helotiales;f__Incertae_sedis_Helotiales;g__Scytalidium;
Marasmius	0	0	0	1.5e-05	0	0	k__Fungi;p__Basidiomycota;c__Agaricomycetes;o__Agaricales;f__Marasmiaceae;g__Marasmius;
Geosmithia	0	0	7e-06	0	0	0	k__Fungi;p__Ascomycota;c__Sordariomycetes;o__Hypocreales;f__Incertae_sedis_Hypocreales;g__Geosmithia;
Exobasidium	7e-06	0	0	0	0	0	k__Fungi;p__Basidiomycota;c__Exobasidiomycetes;o__Exobasidiales;f__Exobasidiaceae;g__Exobasidium;
Curvularia	7e-06	0	0	0	0	0	k__Fungi;p__Ascomycota;c__Dothideomycetes;o__Pleosporales;f__Pleosporaceae;g__Curvularia;
Taeniolella	7e-06	0	0	0	0	0	k__Fungi;p__Ascomycota;c__Dothideomycetes;o__Mytilinidiales;f__Mytilinidiaceae;g__Taeniolella;
Podosphaera	7e-06	0	0	0	0	0	k__Fungi;p__Ascomycota;c__Leotiomycetes;o__Erysiphales;f__Erysiphaceae;g__Podosphaera;
Gibberella	1.1e-05	0	0	0	0	0	k__Fungi;p__Ascomycota;c__Sordariomycetes;o__Hypocreales;f__Nectriaceae;g__Gibberella;
Pseudoplectania	0	1.5e-05	0	0	0	0	k__Fungi;p__Ascomycota;c__Pezizomycetes;o__Pezizales;f__Sarcosomataceae;g__Pseudoplectania;
Atractium	1.1e-05	0	0	0	0	0	k__Fungi;p__Ascomycota;c__Incertae_sedis_Ascomycota;o__Incertae_sedis_Ascomycota;f__Incertae_sedis_Ascomycota;g__Atractium;
Bjerkandera	7e-06	0	0	0	0	0	k__Fungi;p__Basidiomycota;c__Agaricomycetes;o__Polyporales;f__Meruliaceae;g__Bjerkandera;
Sarocladium	0	0	4e-06	0	0	1.5e-05	k__Fungi;p__Ascomycota;c__Sordariomycetes;o__Hypocreales;f__Incertae_sedis_Hypocreales;g__Sarocladium;
Khuskia	7e-06	0	0	4e-06	0	0	k__Fungi;p__Ascomycota;c__Sordariomycetes;o__Trichosphaeriales;f__Incertae_sedis_Trichosphaeriales;g__Khuskia;
Amanita	4e-06	0	0	0	0	0	k__Fungi;p__Basidiomycota;c__Agaricomycetes;o__Agaricales;f__Amanitaceae;g__Amanita;
Truncatella	0	0	0	0	4e-06	0	k__Fungi;p__Ascomycota;c__Sordariomycetes;o__Xylariales;f__Amphisphaeriaceae;g__Truncatella;
Fulgidea	0	0	0	7e-06	0	0	k__Fungi;p__Ascomycota;c__Lecanoromycetes;o__Umbilicariales;f__Umbilicariaceae;g__Fulgidea;
Myxotrichum	0	0	0	4e-06	0	0	k__Fungi;p__Ascomycota;c__Leotiomycetes;o__Incertae_sedis_Leotiomycetes;f__Myxotrichaceae;g__Myxotrichum;
Buergenerula	0	0	0	4e-06	0	0	k__Fungi;p__Ascomycota;c__Sordariomycetes;o__Magnaporthales;f__Magnaporthaceae;g__Buergenerula;
Donadinia	0	4e-06	0	0	0	0	k__Fungi;p__Ascomycota;c__Pezizomycetes;o__Pezizales;f__Sarcosomataceae;g__Donadinia;
Allantonectria	0	0	0	0	0	4e-06	k__Fungi;p__Ascomycota;c__Sordariomycetes;o__Hypocreales;f__Nectriaceae;g__Allantonectria;
Sagenomella	0	0	0	7e-06	0	0	k__Fungi;p__Ascomycota;c__Eurotiomycetes;o__Eurotiales;f__Trichocomaceae;g__Sagenomella;
Septoriella	0	4e-06	0	0	4e-06	0	k__Fungi;p__Ascomycota;c__Dothideomycetes;o__Incertae_sedis_Dothideomycetes;f__Incertae_sedis_Dothideomycetes;g__Septoriella;
Penicillifer	0	0	4e-06	0	0	0	k__Fungi;p__Ascomycota;c__Sordariomycetes;o__Hypocreales;f__Nectriaceae;g__Penicillifer;
Nectria	0	0	0	0	0	4e-06	k__Fungi;p__Ascomycota;c__Sordariomycetes;o__Hypocreales;f__Nectriaceae;g__Nectria;
Gliocladiopsis	0	0	0	4e-06	0	0	k__Fungi;p__Ascomycota;c__Sordariomycetes;o__Hypocreales;f__Nectriaceae;g__Gliocladiopsis;
Laccaria	0	7e-06	0	0	4e-06	0	k__Fungi;p__Basidiomycota;c__Agaricomycetes;o__Agaricales;f__Hydnangiaceae;g__Laccaria;
Podospora	0	4e-06	0	0	0	0	k__Fungi;p__Ascomycota;c__Sordariomycetes;o__Sordariales;f__Lasiosphaeriaceae;g__Podospora;
Phyllactinia	4e-06	0	0	0	0	0	k__Fungi;p__Ascomycota;c__Leotiomycetes;o__Erysiphales;f__Erysiphaceae;g__Phyllactinia;
Hyphodontia	0	4e-06	0	4e-06	0	0	k__Fungi;p__Basidiomycota;c__Agaricomycetes;o__Hymenochaetales;f__Schizoporaceae;g__Hyphodontia;
Galerina	0	0	0	0	4e-06	4e-06	k__Fungi;p__Basidiomycota;c__Agaricomycetes;o__Agaricales;f__Strophariaceae;g__Galerina;
Hygrophorus	0	0	0	0	4e-06	0	k__Fungi;p__Basidiomycota;c__Agaricomycetes;o__Agaricales;f__Hygrophoraceae;g__Hygrophorus;
Japewia	0	4e-06	0	0	0	0	k__Fungi;p__Ascomycota;c__Lecanoromycetes;o__Lecanorales;f__Ramalinaceae;g__Japewia;
Arachnomyces	1.1e-05	0	0	0	0	0	k__Fungi;p__Ascomycota;c__Eurotiomycetes;o__Arachnomycetales;f__Arachnomycetaceae;g__Arachnomyces;
Eucasphaeria	4e-06	0	0	0	0	4e-06	k__Fungi;p__Ascomycota;c__Sordariomycetes;o__Incertae_sedis_Sordariomycetes;f__Incertae_sedis_Sordariomycetes;g__Eucasphaeria;
Sydowia	0	4e-06	0	0	0	0	k__Fungi;p__Ascomycota;c__Dothideomycetes;o__Dothideales;f__Dothioraceae;g__Sydowia;
Lichenobarya	7e-06	0	0	0	0	0	k__Fungi;p__Ascomycota;c__Sordariomycetes;o__Hypocreales;f__Hypocreaceae;g__Lichenobarya;
Conocybe	4e-06	0	0	0	0	0	k__Fungi;p__Basidiomycota;c__Agaricomycetes;o__Agaricales;f__Bolbitiaceae;g__Conocybe;
Hydnotrya	4e-06	0	0	0	0	0	k__Fungi;p__Ascomycota;c__Pezizomycetes;o__Pezizales;f__Discinaceae;g__Hydnotrya;
Westerdykella	4e-06	0	0	0	0	0	k__Fungi;p__Ascomycota;c__Dothideomycetes;o__Pleosporales;f__Sporormiaceae;g__Westerdykella;
Grifola	4e-06	0	0	0	0	0	k__Fungi;p__Basidiomycota;c__Agaricomycetes;o__Polyporales;f__Meripilaceae;g__Grifola;
Resinicium	0	0	0	0	0	4e-06	k__Fungi;p__Basidiomycota;c__Agaricomycetes;o__Incertae_sedis_Agaricomycetes;f__Incertae_sedis_Agaricomycetes;g__Resinicium;
Arthrobotrys	0	0	7e-06	4e-06	0	0	k__Fungi;p__Ascomycota;c__Orbiliomycetes;o__Orbiliales;f__Orbiliaceae;g__Arthrobotrys;
Trichosporon	0	4e-06	0	0	0	0	k__Fungi;p__Basidiomycota;c__Tremellomycetes;o__Trichosporonales;f__Trichosporonaceae;g__Trichosporon;
Leuconeurospora	0	4e-06	0	0	0	0	k__Fungi;p__Ascomycota;c__Incertae_sedis_Ascomycota;o__Incertae_sedis_Ascomycota;f__Pseudeurotiaceae;g__Leuconeurospora;
Macrophomina	0	4e-06	0	0	0	0	k__Fungi;p__Ascomycota;c__Dothideomycetes;o__Botryosphaeriales;f__Botryosphaeriaceae;g__Macrophomina;
Pannaria	0	0	0	0	0	0	k__Fungi;p__Ascomycota;c__Lecanoromycetes;o__Peltigerales;f__Pannariaceae;g__Pannaria;
Panellus	0	0	0	0	0	0	k__Fungi;p__Basidiomycota;c__Agaricomycetes;o__Agaricales;f__Mycenaceae;g__Panellus;
Paraphaeosphaeria	0	0	0	0	0	0	k__Fungi;p__Ascomycota;c__Dothideomycetes;o__Pleosporales;f__Montagnulaceae;g__Paraphaeosphaeria;
Botrytis	0	0	0	0	0	0	k__Fungi;p__Ascomycota;c__Leotiomycetes;o__Helotiales;f__Sclerotiniaceae;g__Botrytis;
Ciborinia	0	0	0	0	0	0	k__Fungi;p__Ascomycota;c__Leotiomycetes;o__Helotiales;f__Sclerotiniaceae;g__Ciborinia;
Chaetomella	0	0	0	0	0	0	k__Fungi;p__Ascomycota;c__Leotiomycetes;o__Incertae_sedis_Leotiomycetes;f__Incertae_sedis_Leotiomycetes;g__Chaetomella;
Rhinocladiella	0	0	0	0	0	0	k__Fungi;p__Ascomycota;c__Eurotiomycetes;o__Chaetothyriales;f__Herpotrichiellaceae;g__Rhinocladiella;
Inocybe	0	0	0	0	0	0	k__Fungi;p__Basidiomycota;c__Agaricomycetes;o__Agaricales;f__Inocybaceae;g__Inocybe;
Others	0.679026	0.722046	0.935377	0.149182	0.142243	0.374219	Others
